1 **A Sir2-regulated locus control region in the recombination enhancer of**  
2 ***Saccharomyces cerevisiae* specifies chromosome III structure**

3 Mingguang Li<sup>2,3</sup>, Ryan D. Fine<sup>1,3</sup>, Manikarna Dinda<sup>1</sup>, Stefan Bekiranov<sup>1</sup>, and Jeffrey S. Smith<sup>1,\*</sup>

4 <sup>1</sup>Department of Biochemistry and Molecular Genetics, University of Virginia School of  
5 Medicine, Charlottesville, VA 22908. <sup>2</sup>Department of Laboratory Medicine, Jilin Medical  
6 University, Jilin, 132013, China

7  
8 <sup>3</sup>Equally contributed to the work.

9 \*Corresponding Author

10 Department of Biochemistry and Molecular Genetics

11 University of Virginia School of Medicine

12 Pinn Hall, Box 800733

13 Charlottesville, VA 22908

14

15 Phone: 434-243-5864

16 Fax: 434-924-5069

17 Email: [jss5y@virginia.edu](mailto:jss5y@virginia.edu)

18

19 Keywords: *SIR2*, condensin, *RDTI*, Hi-C, mating-type switching, chromosome structure, yeast,

20 *Saccharomyces cerevisiae*, yeast, donor preference

21

## 22 **Abstract**

23 The NAD<sup>+</sup>-dependent histone deacetylase Sir2 was originally identified in *Saccharomyces*  
24 *cerevisiae* as a silencing factor for *HML* and *HMR*, the heterochromatic cassettes utilized as  
25 donor templates during mating-type switching. *MATa* cells preferentially switch to *MATα* using  
26 *HML* as the donor, which is driven by an adjacent *cis*-acting element called the recombination  
27 enhancer (RE). In this study we demonstrate that Sir2 and the condensin complex are recruited to  
28 the RE exclusively in *MATa* cells, specifically to the promoter of a small gene within the right  
29 half of the RE known as *RDT1*. We go on to demonstrate that the *RDT1* promoter functions as a  
30 locus control region (LCR) that regulates both transcription and long-range chromatin  
31 interactions. Sir2 represses the transcription of *RDT1* until it is redistributed to a dsDNA break at  
32 the MAT locus induced by the HO endonuclease during mating-type switching. Condensin is  
33 also recruited to the *RDT1* promoter and is displaced upon HO induction, but does not  
34 significantly repress *RDT1* transcription. Instead condensin appears to promote mating-type  
35 switching efficiency and donor preference by maintaining proper chromosome III architecture,  
36 which is defined by the interaction of *HML* with the right arm of chromosome III, including  
37 *MATa* and *HMR*. Remarkably, eliminating Sir2 and condensin recruitment to the *RDT1* promoter  
38 disrupts this structure and reveals an aberrant interaction between *MATa* and *HMR*, consistent  
39 with the partially defective donor preference for this mutant. Global condensin subunit depletion  
40 also impairs mating type switching efficiency and donor preference, suggesting that modulation  
41 of chromosome architecture plays a significant role in controlling mating type switching, thus  
42 providing a novel model for dissecting condensin function *in vivo*.

43

## 44 **Author summary**

45 Sir2 is a highly conserved NAD<sup>+</sup>-dependent protein deacetylase and defining member of the  
46 sirtuin protein family. It was identified about 40 years ago in the budding yeast, *Saccharomyces*  
47 *cerevisiae*, as a gene required for silencing of the cryptic mating-type loci, *HML* and *HMR*.  
48 These heterochromatic cassettes are utilized as templates for mating-type switching, whereby a  
49 programmed DNA double-strand break at the *MATa* or *MATα* locus is repaired by gene  
50 conversion to the opposite mating type. The preference for switching to the opposite mating type  
51 is called donor preference, and in *MATa* cells, is driven by a cis-acting DNA element called the  
52 recombination enhancer (RE). It was believed that the only role for Sir2 in mating-type  
53 switching was silencing HML and HMR. However, in this study we show that Sir2 also regulates  
54 expression of a small gene (*RDT1*) in the RE that is activated during mating-type switching. The  
55 promoter of this gene is also bound by the condensin complex, and deleting this region of the RE  
56 drastically changes chromosome III structure and alters donor preference. The RE therefore  
57 appears to function as a complex locus control region (LCR) that links transcriptional control to  
58 chromatin architecture, and thus provides a new model for investigating the underlying  
59 mechanistic principles of programmed chromosome architectural dynamics.

60

## 61 **Introduction**

62 Since the first descriptions of mating-type switching in budding yeast approximately 40 years  
63 ago, characterization of this process has led to numerous advances in understanding mechanisms  
64 of gene silencing (heterochromatin), cell-fate determination (mating-type), and homologous  
65 recombination (reviewed in [1]. For example, the NAD<sup>+</sup>-dependent histone deacetylase, Sir2,  
66 and other Silent Information Regulator (SIR) proteins, were genetically identified due to their  
67 roles in silencing the heterochromatic *HML* and *HMR* loci, which are maintained as silenced  
68 copies of the active *MAT $\alpha$*  and *MATa* loci, respectively [2-4]. The SIR silencing complex (Sir2-  
69 Sir3-Sir4) is recruited to cis-acting E and I silencer elements flanking *HML* and *HMR* through  
70 physical interactions with silencer binding factors Rap1, ORC, and Abf1, as well as histones H3  
71 and H4 (reviewed in [5]).

72 *HML* and *HMR* play a critical role in mating-type switching. Haploid cells of the same  
73 mating-type cannot mate to form diploids, the preferred cell type in the wild. Therefore, in order  
74 to facilitate mating and diploid formation, haploid mother cells switch their mating type by  
75 expressing HO endonuclease, which introduces a programmed DNA double-strand break (DSB)  
76 at the *MAT* locus [6]. The break is then repaired by homologous recombination using either *HML*  
77 or *HMR* as a donor template for gene conversion [6, 7]. This change in mating type enables  
78 immediate diploid formation between mother and daughter. *HO* is deleted from most standard  
79 lab strains in order to maintain them as haploids, so expression of *HO* from an inducible  
80 promoter such as *P<sub>GALI</sub>* is commonly used to switch mating types during strain construction [8].

81 There is a “donor preference” directionality to mating-type switching such that ~90% of  
82 the time, the HO-induced DSB is repaired to the opposite mating type [9]. For example, *MAT $\alpha$*   
83 cells preferentially switch to *MATa* using *HMR* as the donor. However, while both silent mating

84 loci can be utilized as a donor template, usage of *HML* by *MATa* cells requires a 2.5 kb  
85 intergenic region located ~17 kb from *HML* called the recombination enhancer (RE) [10]. Donor  
86 preference activity within the RE has been further narrowed down to a 700 bp segment  
87 containing an Mcm1/ $\alpha$ 2 binding site (DPS1) and multiple Fkh1 binding sites [10]. The RE is  
88 active in *MATa* cells, requiring Mcm1 and Fkh1 activity at their respective binding sites [10-12].  
89 The RE is inactivated in *MAT $\alpha$*  cells due to expression of transcription factor  $\alpha$ 2 from *MAT $\alpha$*   
90 [13], which forms a repressive heterodimer with Mcm1 (Mcm1/ $\alpha$ 2) to repress *MATa*-specific  
91 genes [1]. Current models for donor preference posit that Fkh1 at the RE helps position *HML* in  
92 close proximity with *MATa* by interacting with threonine-phosphorylated H2A ( $\gamma$ -H2AX) and  
93 Mph1 DNA helicase at the HO-induced DNA DSB [14, 15].

94         Sir2-dependent silencing of *HML* and *HMR* has two known functions related to mating-  
95 type switching. First, *HML* and *HMR* must be silenced in haploids to prevent formation of the  
96 a1/ $\alpha$ 2 heterodimer, which would otherwise inactivate haploid-specific genes such as *HO* [16].  
97 Second, heterochromatin structure at *HML* and *HMR* blocks cleavage by HO, thus restricting its  
98 activity to the fully accessible *MAT* locus [17, 18]. Here we describe new roles for Sir2 and the  
99 condensin complex within the RE during mating-type switching. ChIP-seq analysis revealed  
100 strong overlapping binding sites for Sir2 and condensin at the promoter of a small gene within  
101 the RE known as *RDT1*. Sir2 was found to repress the *MATa*-specific transcription of *RDT1*,  
102 which is also translated into a small 28 amino acid peptide. *RDT1* expression is also dramatically  
103 upregulated during mating-type switching when Sir2 redistributes to the HO-induced DNA DSB  
104 at *MATa*. Furthermore, eliminating Sir2/condensin recruitment to the *RDT1* promoter disrupts  
105 chromosome III architecture such that mating-type switching efficiency and donor preference are  
106 partially impaired. The *RDT1* promoter region therefore functions like a classic locus control

107 region (LCR) in *MATa* yeast cells, regulating localized transcription as well as long-range  
108 chromosome interactions.

109

## 110 **Results**

### 111 **Sir2 and condensin associate with the recombination enhancer (RE)**

112 We previously characterized global sirtuin distribution using ChIP-Seq to identify novel loci  
113 regulated by Sir2 and its homologs [19]. Significant overlap was observed between binding sites  
114 for Sir2, Hst1, or Sum1 with previously described condensin binding sites [19, 20], suggesting a  
115 possible functional connection. ChIP-Seq was therefore performed on WT and *sir2* $\Delta$  strains in  
116 which the condensin subunit Smc4 was C-terminally tagged (13xMyc) (Fig 1A). To avoid  
117 “hyper-ChIPable” loci that can appear in yeast ChIP-seq experiments, we also ran nuclear  
118 localized GFP controls [21]. Genes closest to Sir2-dependent condensin peaks after subtraction  
119 of GFP are listed in Table S1, and are distributed throughout the genome. One of the strongest  
120 peaks overlapped with a Sir2-myc binding site on chromosome III between *KAR4* and *SPB1* that  
121 was not enriched for GFP (Fig 1A). The specificity of Sir2 enrichment at this peak, as opposed to  
122 the adjacent *SPB1* gene, was independently confirmed by quantitative ChIP using an  $\alpha$ -Sir2  
123 antibody (Fig 1B), with enrichment comparable to levels observed at the *HML-I* silencer (Fig 1A  
124 and B). Sir2-dependent condensin binding was also confirmed for Myc-tagged Smc4 and Brn1  
125 subunits (Fig 1C). The  $\sim$ 2.5 kb intergenic region between *KAR4* and *SPB1* was previously  
126 defined as a cis-acting recombination enhancer (RE) that specifies donor preference of mating-  
127 type switching in *MATa* cells [10, 13]. Quantitative ChIP assays revealed that Sir2 and Brn1-myc  
128 enrichment at the RE was also *MATa*-specific (Fig 1D and E), which was notable because the  
129 ChIP-seq datasets in Fig 1A happened to be generated from *MATa* strains. We next considered

130 whether condensin binding in the *MATa sir2Δ* mutant was due to *HMLALPHA2* expression  
131 caused by defective *HML* silencing. To test this idea, we retested Brn1-myc ChIP at the RE in  
132 strains lacking *HML*, and found that deleting *SIR2* no longer affected condensin recruitment (Fig  
133 1F). Similarly, a *MATa* condensin mutant (*ycs4-1*) known to have an *HML* silencing defect [22]  
134 reduced Sir2 recruitment to the RE, but had no effect when *HML* was deleted (Fig 1G). Sir2 and  
135 condensin are therefore independently recruited to the RE specifically in *MATa* cells.

136

### 137 **Sir2 regulates a small gene (*RDTI*) within the RE**

138 Donor preference activity ascribed to the RE was previously narrowed down to a *KAR4*  
139 (*YCL055W*)-proximal 700 bp domain defined by an Mcm1/ $\alpha$ 2 binding site (Fig 2A, *DPS1*) [10,  
140 11, 13]. The Sir2 and condensin ChIP-seq peaks we identified were located outside this region,  
141 between a second Mcm1/ $\alpha$ 2 binding site (*DPS2*) and a small gene of unknown function called  
142 *RDTI* [23] (Fig 1A and 2A). We noticed the location of *RDTI* coincided with the smallest of  
143 several putative non-coding RNAs (ncRNA) previously reported as being transcribed from the  
144 RE, but not annotated in SGD [24, Fig 2A]. Quantitative RT-PCR and analysis of publicly  
145 available RNA-seq data from BY4741 (*MATa*) and BY4742 (*MAT $\alpha$* ) revealed that *RDTI*  
146 expression was indeed *MATa* specific (Fig 2B and S1A).

147 We next asked whether Sir2 and/or condensin regulate histone acetylation and *RDTI*  
148 expression when recruited to the RE. Sir2 normally represses transcription at *HML*, *HMR*, and  
149 telomeres as a catalytic subunit of the SIR complex where it preferentially deacetylates H4K16  
150 (reviewed in [5]). Accordingly, deleting *SIR2*, *SIR3*, or *SIR4* from *MATa* cells increased H4K16  
151 acetylation at the *RDTI* promoter (Fig 2C), consistent with the observed enrichment of Sir3-myc  
152 and Sir4-myc at this site (Fig S1B). Furthermore, re-introducing active *SIR2* into the *sir2Δ*

153 mutant restored H4K16 to the hypoacetylated state, whereas catalytically inactive *sir2-H364Y*  
154 did not (Fig 2D).

155 Deleting *SIR2* initially appeared to repress *RDT1* expression in *MATa* cells (Fig 2E), but  
156 we hypothesized this was due to *HMLALPHA2* derepression and formation of the Mcm1/ $\alpha$ 2  
157 repressor, which could locally repress *RDT1* through the adjacent Mcm1/ $\alpha$ 2 binding sites.  
158 Indeed, simultaneously deleting *SIR2* and *HML* resulted in very high *RDT1* expression (Fig 2E),  
159 which was increased even further when the paralogous *HST1* gene was also deleted (Fig S1C),  
160 indicating some redundancy. By eliminating *HML* we also observed elevated histone H3  
161 acetylation in the absence of *SIR2* (Fig 2F), providing strong evidence that the SIR complex  
162 establishes a generally hypoacetylated chromatin environment at the *RDT1* promoter that  
163 requires effective silencing at *HML*. On the other hand, *RDT1* was not upregulated in an *hml* $\Delta$   
164 *ycs4-1* condensin mutant (Fig 2G), suggesting that condensin has a different functional role at  
165 this locus.

166 We next attempted to block Sir2 and condensin recruitment to the *RDT1* promoter by  
167 precisely deleting a 100bp DNA sequence underlying the shared enrichment region (coordinates  
168 30701-30800), while not disturbing the adjacent Mcm1/ $\alpha$ 2 site (Fig 3A). Sir2 and Brn1-myc  
169 binding to the RE as measured by ChIP was greatly diminished in this mutant (Fig 3B and 3C),  
170 despite unaltered Sir2, Brn1-myc, or Smc4-myc expression levels (Fig S2A-C). Furthermore,  
171 *RDT1* transcriptional expression was significantly increased by the 100bp deletion exclusively in  
172 *MATa* cells (Fig 3D), consistent with the loss of Sir2-mediated repression.

173 Because Sir2 and condensin were not present at the *RDT1* promoter in *MATa* cells, we  
174 reasoned that their binding should require a *MATa* specific transcription factor. This made the 2<sup>nd</sup>  
175 Mcm1/ $\alpha$ 2 binding site (DPS2) upstream of the Sir2/condensin ChIP-seq peaks an ideal candidate



176 because it has not been ascribed a function other than redundancy with DPS1. Deleting *MCM1* is  
177 lethal, so alternatively, we deleted the 2<sup>nd</sup> Mcm1/ $\alpha$ 2 binding site (ChrIII coordinates 30595 to  
178 30626, Fig S3A) and then retested for Sir2 and Brn1-myc enrichment. As shown in Fig S3B and  
179 S3C, respectively, Sir2 and Brn1-myc enrichment at both the Mcm1/ $\alpha$ 2 binding site (DPS2) and  
180 the *RDT1* promoter (defined as the Sir2/condensin peaks) was significantly reduced in the  
181 binding site mutant. These results suggest that Mcm1 may nucleate a complex that recruits the  
182 SIR and condensin complexes to the *RDT1* promoter in *MATa* cells, and also provides a possible  
183 mechanism of blocking the recruitment in *MAT $\alpha$*  cells due to the interaction of Mcm1 with  $\alpha$ 2.  
184

#### 185 ***RDT1* encodes a translated mRNA**

186 Ribosome Detected Transcript-1 (*RDT1*) was originally annotated as a newly evolved  
187 gene whose transcript was associated with ribosomes and predicted to have a small open reading  
188 frame of 28 amino acids [23]. Our work suggested that *RDT1* and the putative non-coding R2  
189 transcript were the same (Fig 2A). To determine if *RDT1*/R2 codes for a small protein, the ORF  
190 was C-terminally fused with a 13x-Myc epitope in *MATa* and *MAT $\alpha$*  cells. As shown in Fig 3E, a  
191 fusion protein was detectable in exponentially growing *MATa* WT cells and also highly  
192 expressed in the 100bp $\Delta$  background, correlating with the increased RNA level observed for that  
193 mutant in Fig 3D.

194 Additional *MATa*-specific RNAs are derived from the minimal 700bp RE domain (Fig  
195 2A; R1L and R1S) [13, 25], so we next tested whether Sir2 controls their expression from a  
196 distance. As shown in Fig 3F, qRT-PCR using standard oligo(dT) primers for cDNA synthesis  
197 effectively measured *RDT1* expression at predicted levels for the various strains tested, but the  
198 R1 RNAs were not detectable. Many long non-coding RNAs (lncRNAs) are not polyadenylated

199 [26], so the cDNA synthesis was repeated using random hexamer primers. In *MATa* WT cells  
200 (ML1), R1L/S RNAs were now detected at levels comparable to *RDT1* (Fig 3G). Similar to  
201 *RDT1*, R1L/S RNAs were repressed in the absence of *SIR2* due to the *HMLALPHA2*  
202 pseudodiploid derepression phenotype. But unlike *RDT1*, the R1L/S RNA expression level was  
203 not elevated in the 100bp $\Delta$  or *hml* $\Delta$  *sir2* $\Delta$  mutants, indicating these RNAs are not under direct  
204 Sir2 control, but are strongly repressed in the absence of Sir2. We conclude that the R1L/S  
205 RNAs are most likely non-polyadenylated lncRNAs, whereas *RDT1* is Sir2-repressed and  
206 polyadenylated mRNA that can be translated into a small protein of unknown function.

207

### 208 **Sir2 and condensin are displaced from the *RDT1* promoter during mating-type switching**

209 We next asked if Sir2 played any role in regulating *RDT1* during mating-type switching. Sir2  
210 was previously shown to associate with a HO-induced DSB at the *MAT* locus during mating-type  
211 switching, presumably to effect repair through histone deacetylation [27]. Transient Sir2  
212 recruitment to the DSB could potentially occur at expense of the *RDT1* promoter, thus resulting  
213 in *RDT1* derepression. To test this idea, HO was induced at time 0 with galactose and then turned  
214 off 2 hours later by glucose addition to allow for repair/switching to occur (Fig 4A and B). By  
215 the 3 hr time point (1hr after glucose addition), ChIP analysis indicated Sir2 was maximally  
216 enriched at the *MAT* locus (Fig 4C), corresponding to the time of peak mating-type switching  
217 ([27] and Fig 4B). Interestingly, Sir2 was significantly depleted from the *RDT1* promoter within  
218 1 hr after HO induction, and by 3 hr there was actually stronger enrichment of Sir2 at *MAT* than  
219 *RDT1* (Fig 4C). Critically, this apparent Sir2 redistribution coincided with maximal induction of  
220 *RDT1* mRNA and the Myc-tagged Rdt1 protein (Fig 4D and 4E, 3 hr). Once switching was  
221 completed by 4 hr (2hr after glucose addition), *RDT1* transcription was permanently inactivated

222 and Sir2 binding never returned because most cells were now *MAT $\alpha$* . The Myc-tagged Rdt1  
223 protein, however, remained elevated for the rest of the time course (Fig 4E), suggesting that it is  
224 relatively stable, at least when epitope tagged. A parallel ChIP time course experiment was  
225 performed with condensin (Brn1-myc), resulting in significant depletion from the *RDT1*  
226 promoter within 1 hr (Fig 4F), similar to the timing of Sir2 loss. However, rather than  
227 redistributing to the DSB, Brn1-myc enrichment was actually reduced at the break site,  
228 suggesting that condensin normally associates with *MAT $\alpha$*  in non-switching cells, but becomes  
229 displaced in response to the HO-induced DSB, perhaps to facilitate structural reorganization  
230 associated with switching.

231

### 232 **The *RDT1* promoter region controls chromosome III architecture**

233 The coupling of Sir2 and condensin distribution with *RDT1* transcriptional regulation during  
234 mating-type switching was reminiscent of classic locus control regions (LCR) that modulate  
235 long-range chromatin interactions. We therefore hypothesized that the *RDT1* promoter region  
236 may function as an LCR to modulate long-range chromatin interactions of chromosome III. To  
237 test this hypothesis, we performed Hi-C analysis with WT, *sir2 $\Delta$*  and the 100bp $\Delta$  strains.  
238 Genomic contact differences between the mutants and WT were quantified using the HOMER  
239 Hi-C software suite [28], and the frequency of statistically significant differences for each  
240 chromosome calculated (Fig 5A). Chromosome III had the most significant differences in both  
241 mutants, so we focused on this chromosome and used HOMER to plot the observed/expected  
242 interaction frequency in 10kb bins for each strain as a heat map (Fig 5B). In a WT strain (ML1)  
243 there was strong interaction between the left and right ends of chromosome III, mostly centered  
244 around the *HML* (bin 2) and *HMR* (bin 29) loci. Interestingly, *HML* (bin 2) also appeared to

245 sample the entire right arm of chromosome III, with the interaction frequency increasing as a  
246 gradient from *CEN3* to a maximal observed interaction at *HMR*, thus also encompassing the  
247 *MATa* locus at bin 20. This distinct interaction pattern was completely disrupted in the *sir2Δ*  
248 mutant, whereas some telomere-telomere contact was retained in the 100bpΔ mutant (Fig 5B),  
249 suggesting there was still limited interaction between the left and right ends of the chromosome.  
250 We confirmed the changes in *HML-HMR* interaction for these strains using a quantitative 3C-  
251 PCR assay to rule out sequencing artifacts, and also confirmed an earlier *sir2Δ* 3C result from  
252 the Dekker lab [29]. Importantly, despite the loss of *HML-HMR* interaction in the 100bpΔ  
253 mutant, heterochromatin at these domains was unaffected based on normal quantitative mating  
254 assays (Fig S4A), and unaltered Sir2 association with *HML* (Fig S4B).

255 We next analyzed the Hi-C data using an iterative correction method that reduces  
256 background to reveal interacting loci that potentially drive the overall chromosomal architecture,  
257 rather than passenger locus effects [30]. *HML* (bin 2) and *HMR* (bin 29) again formed the  
258 dominant interaction pair off the diagonal in WT, which was lost in the *sir2Δ* or 100bpΔ mutants  
259 (Fig 5D). Importantly, a prominent new interaction between *HMR* (bin 29) and *MATa* (bin 20)  
260 appeared in both mutants (Fig 5D and E), as would be predicted if normal donor preference of  
261 *MATa* cells was altered. We conclude that the *RDTI* promoter does function like an LCR in  
262 *MATa* yeast cells, regulating localized transcription as well as long-range chromatin interactions  
263 relevant to mating-type switching (Fig 5E).

264

### 265 **Sir2 and condensin regulate mating-type switching**

266 Sir2/condensin binding was observed in the right half of the RE (Fig 1A), but this region was  
267 previously reported as being dispensable for donor preference activity [10]. Considering that

268 *HMR* was aberrantly associated with the *MATa* locus in *sir2Δ* and 100bpΔ mutants (Fig 5), we  
269 proceeded to test whether these mutants had any alterations in donor preference. A reporter strain  
270 was used in which *HMRa* on the right arm of chromosome III was replaced with an *HMRα* allele  
271 containing a *Bam*HI site (*HMRα-B*) (Fig 6A). After inducing switching to *MATα* following HO  
272 induction with galactose, the proportion of *HMLα* or *HMRα-B* utilization for switching was  
273 determined by *Bam*HI digestion of a *MATα*-specific PCR product (Fig 6B) [15]. As expected for  
274 normal donor preference, *HMRα-B* on the right arm was only utilized ~9% of the time in the  
275 WT strain, as compared to 91% for *HMLα* (Fig 6C). Strikingly, donor preference was  
276 completely lost in the *sir2Δ* mutant, similar to a control strain with the RE deleted (Fig 6C and  
277 D), and consistent with the clear interaction between *HMR* and *MATa* observed for the *sir2Δ*  
278 mutant in Fig 5D and E. This interaction was less prominent in the 100bpΔ mutant (Fig 5D), and  
279 the change in donor preference was also less severe (~25% *HMRα-B*), though still significantly  
280 different from WT (Fig 6C and D). Additionally, we measured the efficiency of switching to  
281 *MATα* across a time course in the ML1 strain background used for CHIP and Hi-C analyses, and  
282 did not observe a significant difference between WT and the 100bpΔ mutant. However,  
283 switching to *MATα* was severely impaired in the *sir2Δ* mutant (Fig 6E). We suspect the larger  
284 effect on switching efficiency and donor preference in *sir2Δ* cells is due to the derepression of  
285 *HMLALPHA2*, because  $\alpha 2$  protein normally inactivates the RE in *MATα* cells [13]. Silencing of  
286 *HML* is therefore critical for donor preference in the mating-type switching of *MATa* cells by  
287 preventing expression of the repressive  $\alpha 2$  transcription factor.

288         Since condensin is also recruited to the *RDT1* promoter region, we were next interested in  
289 whether condensin activity was important for mating-type switching. Each gene for the  
290 condensin subunits is essential, so instead of using deletions, in the ML1 strain background we

291 C-terminally tagged the Brn1 subunit with an auxin-inducible degron (AID) fused with a V5  
292 epitope. This system allows for rapid depletion of tagged proteins upon addition of auxin to the  
293 growth media [31]. Indeed, Brn1-AID was effectively degraded within 15 min of adding auxin  
294 (Fig S5A). Importantly, even after 1 hr of auxin treatment, there were no changes in *RDT1* or  
295 *HMLALPHA2* gene expression indicated by qRT-PCR (Fig S5B and C), indicating that silencing  
296 of *HML* was unaffected, unlike the *ycs4-1* condensin mutant used in Fig 1G [22]. The efficiency  
297 of ML1 switching from *MATa* to *MATα* was then tested across a time course with or without  
298 auxin treatment (Fig 7A). As shown in Fig 7B and C, auxin treatment significantly slowed the  
299 pace of switching to *MATα*, which also suggested there could be a modest effect on donor  
300 preference similar to that observed with the 100bpΔ strain. Indeed, Brn1-AID depletion produced  
301 a minor, yet significant, alteration in donor preference using the *HMRα*-B reporter strain (Fig  
302 7D). Taken together, these results support a model whereby condensin recruited to the *RDT1*  
303 promoter in *MATa* cells organizes chromosome III into a conformation that favors association of  
304 the *MATa* locus with *HML* instead of *HMR*, thus partially contributing to donor preference  
305 regulation.

306

## 307 **Discussion**

308 *SIR2* was identified almost 40 years ago as a recessive mutation unlinked from *HML* and *HMR*  
309 that caused their derepression [3, 4], and has been extensively studied ever since as encoding a  
310 heterochromatin factor that functions not only at the *HM* loci, but also telomeres and the rDNA  
311 locus (reviewed in [5]). In this study we describe a previously unidentified Sir2 binding site that  
312 overlaps with a major non-rDNA condensin binding site within the RE on chromosome III in  
313 *MATa* cells. Here, Sir2 regulates a small gene of unknown function called *RDT1*, which is

314 transcriptionally activated during mating-type switching due to redistribution of repressive Sir2  
315 from the *RDTI* promoter to the HO-induced DSB at *MATa*. The *RDTI* RNA transcript is also  
316 polyadenylated and translated into a small protein, but we have not yet been able to assign a  
317 function to the gene or protein because deleting the 28 amino acid ORF had no measurable effect  
318 on mating-type switching when using the *GAL-HO* based assays tested thus far (data not shown).  
319 It remains possible that deleting *RDTI* would have a significant effect on switching in the  
320 context of native HO expression, which is expressed only in mother cells during late G1,  
321 whereas the *GALI-HO* is overexpressed in all cells throughout the cell cycle. It is also possible  
322 that *RDTI* functions as a non-coding RNA that happens to be translated into a small non-  
323 functional peptide. Alternatively, transcription of *RDTI* could directly function in chromosome  
324 III conformation by altering local chromatin accessibility at the promoter. Such a model was  
325 proposed for regulation of donor preference by transcription of the R1S/R1L non-coding RNAs  
326 [13, 25]. Dissecting the function(s) of *RDTI* therefore remains an area of active investigation for  
327 the lab, and perhaps the key to fully understanding how its promoter functions as an LCR.

328

### 329 **Functional complexity within the RE**

330 While we do not yet know the molecular function of *RDTI* in mating-type regulation or  
331 other cellular processes, the promoter region of this gene clearly controls the structure of  
332 chromosome III. Three-dimensional chromatin structure has long been proposed to influence  
333 donor preference [32, 33]. However, deleting the minimal 700bp (left half) of the RE alters  
334 donor preference without a large change in chromosome III conformation. Furthermore, deleting  
335 the right half of the RE, which includes *RDTI*, changes chromosome III conformation without a  
336 dramatic change in donor preference [10, 13, 34]. Based on these findings it was proposed that

337 the RE is a bipartite regulatory element [34], with the left half primarily responsible for donor  
338 preference activity and the right half for chromosome III structure. Our results support this view  
339 and narrow down the structural regulatory domain of the RE to a small (100bp) region of the  
340 *RDTI* promoter bound by the SIR and condensin complexes. Importantly, deleting this small  
341 region not only altered chromosome III structure, but also had a significant effect on donor  
342 preference, though not as strong as the *sir2Δ* mutation.

343         The coordination of *RDTI* expression with loss of Sir2/condensin binding at its promoter  
344 during mating-type switching, together with the loss of *HML-HMR* interaction in the 100bpΔ  
345 mutant, makes this site intriguingly similar to classic locus control regions (LCRs) in metazoans,  
346 which are cis-acting domains that contain a mixture of enhancers, insulators, chromatin opening  
347 elements, and tissue-specificity elements [35]. The minimal RE was previously described as an  
348 LCR in the context of donor preference [10], and transcription of the R1S/R1L long non-coding  
349 RNAs via activation by the 1<sup>st</sup> Mcm1/α2 binding site (DPS1) appears to be important for this  
350 activity in *MATa* cells [25]. We find that Sir2 indirectly supports donor preference from the left  
351 half of the RE in *MATa* cells by silencing *HMLALPHA2* expression, which prevents  
352 transcriptional repression by an Mcm1/α2 heterodimer. Similarly, the loss of Sir2 also represses  
353 *RDTI* expression and condensin recruitment in the right half of the RE due to *HMLALPHA2*  
354 expression. However, Sir2 directly represses *RDTI* through localized histone deacetylation. How  
355 the loss of *RDTI* regulation and condensin recruitment changes chromosome III structure in the  
356 *sir2Δ* mutant remains unknown, but we propose that the *HMR-MATa* interaction is a default  
357 state, while the *HML-HMR* association has to be actively maintained by condensin and likely  
358 additional factors co-localized to this element.



359            Interestingly, there also appears to be a function relationship between the RE and  
360 silencing at the *HML* locus, such that deleting the left half of the RE specifically stabilizes *HML*  
361 silencing in *MATa* cells [36]. The mechanism involved remains unknown, but we hypothesize  
362 that eliminating this part of the RE could potentially allow the SIR and condensin complexes  
363 bound at the *RDTI* promoter encroach and somehow enhance the heterochromatic structure at  
364 *HML*. Under this scenario, the left half of the RE could be insulating *HML* from the  
365 chromosomal organizing activity that occurs at the *RDTI* promoter.

366

### 367 **Condensin function in mating-type switching**

368            The *RDTI* promoter was a major condensin binding site identified by ChIP-seq (Fig 1),  
369 and given the strong Hi-C interaction between nearby *HML* and the *HMR* locus, we initially  
370 hypothesized that condensin at the *RDTI* promoter would crosslink with another condensin site  
371 bound on the right arm of chromosome III. ChIP-seq of Smc4-myc did not reveal any strong  
372 peaks near *HMR*, but condensin was clearly enriched at *CEN3* (data not shown). Interestingly,  
373 the *S. cerevisiae* condensin complex was recently shown to catalyze ATP-dependent  
374 unidirectional loop extrusion using an *in vitro* single molecule assay [37]. The mechanism  
375 involves direct binding of condensin to DNA, followed by one end of the bound DNA being  
376 pulled inward as an extruded loop. Applying this model to the strong binding site at the *RDTI*  
377 promoter, this region could act as an anchor bound by condensin, with DNA to the right being  
378 rapidly extruded as a loop until pausing at *CEN3*. Extrusion would then continue at a slower rate  
379 toward *HMR*, allowing *HML* the time to sample the entire right arm of chromosome III, until  
380 clustering with *HMR*. HOMER analysis of the Hi-C data in Fig 5B provides evidence for such a  
381 model because there is an ascending gradient of *HML* interaction frequency with sequences

382 extending from the centromere region (bin 2) toward *HMR*, suggesting that *HML* “samples” the  
383 right arm of chromosome III. Once brought in contact, *HML* and *HMR* would then remain  
384 associated due to their heterochromatic states and shared retention at the nuclear envelope [38] In  
385 addition to preventing *HMR* association with *MATa*, we hypothesize that the looped chromosome  
386 III structure makes the chromosome licensed for mating-type switching in response to the HO-  
387 induced DSB during G1.

388

### 389 ***MATa* specific recruitment of Sir2 and condensin to the RE**

390 Condensin, and Sir2 each strongly associated with the *RDT1* promoter exclusively in *MATa*  
391 cells, though it is not clear if they bind at the same time, or are differentially bound throughout  
392 the cell cycle. Since DPS2 was required for Sir2 and condensin recruitment, and derepression of  
393 *HMLALPHA2* from *HML* also eliminated binding, we hypothesized and then demonstrated (Fig  
394 S3) that Mcm1 was a key DNA binding factor involved. Mcm1 is a prototypical MADS box  
395 combinatorial transcription factor that derives its regulatory specificity through interactions with  
396 other factors, such as Ste12 in the case of *MATa* haploid-specific gene activation, or  $\alpha 2$  when  
397 repressing the same target genes in *MAT $\alpha$*  cells [39]. This raises the question of whether Mcm1  
398 directly recruits the SIR and condensin complexes, or perhaps additional factors that work with  
399 Mcm1 are involved. At the *RDT1* promoter, specificity for Sir2/condensin recruitment could  
400 originate from sequences underlying the condensin/Sir2 peaks. There are no traditional silencer-  
401 like sequences for SIR recruitment within the deleted 100bp (coordinates 30702 to 30801), and  
402 yeast condensin does not appear to have a consensus DNA binding sequence [40]. Closer  
403 inspection of the *RDT1* promoter indicates an A/T rich region with consensus binding sites for  
404 the transcription factors Fkh1/2 and Ash1, each of which regulates mating-type switching [11,

405 41, 42]. Fkh1 and Fkh2 also physically associate with Sir2 at the mitotic cyclin *CLB2* promoter  
406 during stress [43]. Ash1 is intriguing because it represses HO transcription in daughter cells [42,  
407 44], raising the possibility of *RDT1* repression in daughter cells. Mcm1 activity in *MATa* cells  
408 could also indirectly establish a chromatin environment that is competent for Sir2/condensin  
409 recruitment, rather than direct recruitment through protein-protein interactions. In *MATa* cells,  
410 Mcm1 appears to prevent the strong nucleosome positioning across the RE that occurs in *MAT $\alpha$*   
411 cells [25], and indicative of an actively remodeled chromatin environment. Perhaps condensin is  
412 attracted to such regions, which is consistent with the association of condensin with promoters of  
413 active genes in mitotic cells, where enrichment was greatest at unwound regions of DNA [45].  
414 Furthermore, nucleosome eviction by transcriptional coactivators was found to assist condensin  
415 loading in yeast [46], though the mechanism of loading remains poorly understood. Recruitment  
416 of condensin to the *RDT1* promoter LCR therefore provides an outstanding opportunity for  
417 dissecting mechanisms of condensin loading and function.

418

## 419 **Methods**

### 420 **Yeast strains, plasmids, and media**

421 Yeast strains were grown at 30°C in YPD or synthetic complete (SC) medium where indicated.  
422 The *SIR2*, or *HST1* open reading frames (ORFs) were deleted with *kanMX4* using one-step PCR-  
423 mediated gene replacement. *HML* was deleted and replaced with *LEU2*. A 100bp deletion within  
424 the *RDT1* promoter (chrIII coordinates 30701-30800) or *DPS2* deletion (chrIII coordinates  
425 30557-30626) was generated using the *delitto perfetto* method [47]. Endogenous *SIR2*, *BRN1*, or  
426 *SMC4* genes were C-terminally tagged with the 13xMyc epitope (13-EQKLISEEDL). Deletion  
427 and tagged genes combinations were generated through genetic crosses and tetrad dissection,

428 including Brn1 tagged with a V5-AID tag (template plasmids kindly provided by Vincent  
429 Guacci). All genetic manipulations were confirmed by PCR, and expression of tagged proteins  
430 confirmed by western blotting. The pGAL-HO-URA3 expression plasmid was kindly provided  
431 by Jessica Tyler [27]. Strain genotypes are provided in Supplemental Table S2 and  
432 oligonucleotides listed in Table S3.

433

#### 434 **ChIP-Seq analysis**

435 Sir2 ChIP-seq was previously described [19]. For other ChIP-seq datasets, log-phase YPD  
436 cultures were cross-linked with 1% formaldehyde for 20 min, pelleted, washed with Tris-  
437 buffered saline (TBS), and then lysed in 600  $\mu$ l FA140 lysis buffer with glass beads using a  
438 mini-beadbeater (BioSpec Products). Lysates were removed from the beads and sonicated for 60  
439 cycles (30s “on” and 30s “off” per cycle) in a Diagenode Bioruptor. Sonicated lysates were  
440 pelleted for 5 min at 14000 rpm in a microcentrifuge and the entire supernatant was transferred  
441 to a new microfuge tube and incubated overnight at 4°C with 5  $\mu$ g of anti-Myc antibody (9E10)  
442 and 20  $\mu$ l of protein G magnetic beads (Millipore). Following IP, the beads were washed once  
443 with FA140 buffer, twice with FA500 buffer, and twice with LiCl wash buffer. DNA was eluted  
444 from the beads in 1% SDS/TE buffer and cross-links were reversed overnight at 65°C. The  
445 chromatin was then purified using a Qiagen PCR purification kit. Libraries were constructed  
446 using the Illumina TruSeq ChIP Sample Prep kit and TrueSeq standard protocol with 10ng of  
447 initial ChIP or Input DNA. Libraries that passed QC on a Bioanalyzer High Sensitivity DNA  
448 Chip (Agilent Technologies) were sequenced on an Illumina Miseq (UVA DNA Sciences Core).

449

#### 450 **ChIP-seq computational analysis**

451 Biological duplicate fastq files were concatenated together and reads mapped to the sacCer3  
452 genome using Bowtie with the following options: `---best, --stratum, --nomaqground, and --m10`  
453 [48]. The resulting bam files were then converted into bigwig files using BEDTools [49]. As part  
454 of the pipeline, chromosome names were changed from the sacCer3 NCBI values to values  
455 readable by genomics viewers e.g. "ref[NC\_001133]" to "chrI". The raw and processed datasets  
456 used in this study have been deposited in NCBI's GEO and are accessible through the GEO  
457 series accession number GSE92717. Downstream GO analysis was performed as follows.  
458 MACS2 was used to call peaks with the following options: `--broad, --keep-dup, -tz 150, and -m`  
459 `3, 1000` [50]. GFP peaks in the WT or *sir2Δ* backgrounds were subtracted from the WT *SMC4-*  
460 *I3xMyc* and *sir2Δ SMC4-I3xMyc* peaks, respectively, using BEDTools "intersect" with the `-v`  
461 option. The resulting normalized peaks were annotated using BEDTools "closest" with the `-t all`  
462 option specified, and in combination with a yeast gene list produced from USCS genome tables.  
463 The annotated peaks were then analyzed for GO terms using YeastMine  
464 ([yeastmine.yeastgenome.org](http://yeastmine.yeastgenome.org)).

465

#### 466 **Hi-C analysis**

467 Log-phase cultures were cross-linked with 3% formaldehyde for 20 min and quenched with a 2x  
468 volume of 2.5M Glycine. Cell pellets were washed with dH<sub>2</sub>O and stored at -80°C. Thawed cells  
469 were resuspended in 5 ml of 1X NEB2 restriction enzyme buffer (New England Biolabs) and  
470 poured into a pre-chilled mortar containing liquid N<sub>2</sub>. Nitrogen grinding was performed twice as  
471 previously described [51], and the lysates were then diluted to an OD<sub>600</sub> of 12 in 1x NEB2 buffer.  
472 500 μl of cell lysate was used for each Hi-C library as follows. Lysates were solubilized by the  
473 addition of 50 μl 1% SDS and incubation at 65°C for 10 min. 55 μl of 10% TritonX-100 was

474 added to quench the SDS, followed by 10  $\mu$ l of 10X NEB2 buffer and 15  $\mu$ l of *Hind*III (New  
475 England Biolabs, 20 U/ $\mu$ l) to digest at 37°C for 2 hr. An additional 10  $\mu$ l of *Hind*III was added  
476 for digestion overnight. The remainder of the protocol was based on previously published work  
477 with minor exceptions [52]. In short, digested chromatin ends were filled-in with Klenow  
478 fragment (New England Biolabs) and biotinylated dCTP at 37°C for 1 hr, then heat inactivated at  
479 70°C for 10 min. Ligation reactions with T4 DNA ligase were performed at 16°C for a minimum  
480 of 6 hr using the entire Hi-C sample diluted into a total volume of 4 ml. Proteinase K was added  
481 and cross-links were reversed overnight at 70°C. The ligated chromatin was phenol:chloroform  
482 extracted, ethanol precipitated, then resuspended in 500 $\mu$ l dH<sub>2</sub>O and treated with RNase A for  
483 45 min. Following treatment with T4 DNA polymerase to remove biotinylated DNA ends that  
484 were unligated, the samples were concentrated with a Clean and Concentrator spin column  
485 (Zymogen, D4013) and sheared to approximately 300bp with a Diagenode Bioruptor.  
486 Biotinylated fragments were captured with 30  $\mu$ l pre-washed Streptavidin Dynabeads  
487 (Invitrogen), then used for library preparation. Hi-C sequencing libraries were prepared with  
488 reagents from an Illumina Nextera Mate Pair Kit (FC-132-1001) using the standard Illumina  
489 protocol of End Repair, A-tailing, Adapter Ligation, and 12 cycles of PCR. PCR products were  
490 size selected and purified with AMPure XP beads before sequencing with an Illumina Miseq or  
491 Hiseq. Raw and mapped reads deposited at GEO (GSE92717).

492

### 493 **Hi-C computational analysis**

494 Iteratively corrected heatmaps were produced using python scripts from the Mirny lab hiclib  
495 library, <http://mirnylab.bitbucket.org/hiclib/index.html>. Briefly, reads were mapped using the  
496 iterative mapping program, which uses Bowtie2 to map reads and iteratively trims unmapped

497 reads to increase the total number of mapped reads. Mapped reads were then parsed into an hdf5  
498 python data dictionary for storage and further analysis. Mapped reads of the same strains were  
499 concatenated using the hiclib library's "Merge" function. Both individual and concatenated  
500 mapped reads have been deposited in GEO. Mapped reads were then run through the fragment  
501 filtering program using the default parameters as follows: filterRsiteStart(offset=5),  
502 filterDuplicates, filterLarge, filterExtreme (cutH=0.005, cutL=0). Raw heat maps were further  
503 filtered to remove diagonal reads and iteratively corrected using the 03 heat map processing  
504 program. Finally, the iteratively corrected heatmaps were normalized for read count differences  
505 by dividing the sum of each row by the sum of the max row for a given plot, which drives all  
506 values towards 1 to make individual heatmaps comparable.

507 Observed/Expected heatmaps were created using HOMER Hi-C analysis software on the  
508 BAM file outputs from the iterativemapping program of the hiclib library python package [28].  
509 Tag directories were created using all experimental replicates of a given biological sample and  
510 the `tbp -1` and `illuminaPE` options. Homer was also used to score differential chromosome  
511 interactions between the WT and mutant Hi-C heatmaps. The resulting list of differential  
512 interactions was uploaded into R where the given p-value was adjusted to a qvalue with `p.adjust`.  
513 An FDR cutoff of 0.05 was used to create a histogram of significantly different chromosome  
514 interactions in the mutants compared to WT. The histogram was further normalized by dividing  
515 the total number of significant differential interactions for a chromosome by total number of  
516 interactions called in the WT sample for that chromosome to account for size differences in the  
517 chromosomes. Thus, frequency represents the number of interactions that changed out of all  
518 possible interactions that could have changed.  
519

520 **RNA-seq data analysis**

521 RNA-Seq data was acquired from GEO accessions GSE73274 [53] and GSE58319 [54] for the  
522 BY4742 (*MAT $\alpha$* ) and BY4741 (*MATa*) backgrounds, respectively. Reads were then mapped to  
523 the *sacCer3* genome using Bowtie2 with no further processing of the resulting BAM files  
524 visualized in this paper.

525

526 **3C assays**

527 Chromosome Conformation Capture (3C) was performed in a similar manner to Hi-C with a few  
528 exceptions due to assay-specific quantification via quantitative real-time PCR rather than  
529 sequencing. Most notably, digested DNA ends were not filled in with dCTP-biotin before  
530 ligation and an un-crosslinked control library was created for each 3C library. Furthermore, all  
531 PCR reactions were normalized for starting DNA concentration using a *PDCI* intergenic region  
532 that is not recognized by *HindIII*, in addition to PCR of the un-crosslinked control for all tested  
533 looping interaction primer pairs.

534

535 **Quantitative reverse transcriptase (RT) PCR assay**

536 Total RNA (1  $\mu$ g) was used for cDNA synthesis with oligo(dT) and Superscript II reverse  
537 transcriptase as previously described [55].

538

539 **Western blot**

540 Proteins were blotted using standard TCA extraction followed by SDS-PAGE as previously  
541 described [19]. Myc-tagged proteins were incubated with an anti-Myc primary antibody 9E10  
542 (Millipore) at a 1:2000 dilution while tubulin was incubated with anti-Tubulin antibody B-5-1-2



543 (Sigma-Aldrich) at a 1:1500 dilution. The V5-AID tagged Brn1 was detected with anti-V5  
544 antibody (Invitrogen, R96025) at a 1:4000 dilution. Primary antibodies were detected with an  
545 anti-mouse secondary antibody conjugated to HRP (Promega) at 1:5000 dilution in 5% fat-free  
546 milk. Bands were then visualized with HyGlo (Denville Scientific) capture on autoradiography  
547 film (Denville Scientific).

548

### 549 **Mating-type switching assays**

550 For tracking the efficiency of switching, strains were transformed with pGAL-HO-*URA3*, pre-  
551 cultured in SC-ura + raffinose (2%) medium overnight, re-inoculated into the same medium  
552 (OD<sub>600</sub>=0.05) and then grown into log phase. Galactose (2%) was added to induce HO  
553 expression for 45 min. Glucose (2%) was then added and aliquots of the cultures were harvested  
554 at indicated time points. Genomic DNA was isolated and 10 ng used for PCR amplification.  
555 *MAT $\alpha$*  was detected using primers JS301 and JS302. The *SCR1* gene on chromosome V was used  
556 as a loading control (primers JS2665 and JS2666). PCR products were separated on a 1%  
557 agarose gel stained with ethidium bromide and then quantified using ImageJ. Donor preference  
558 with strains containing *HMR $\alpha$ -B* was performed as previously described [15]. Briefly, *MAT $\alpha$*   
559 was amplified with primers Yalpha105F and MATdist-4R from genomic DNA 90 after  
560 switching was completed (90 min), and then digested with BamHI. Ethidium stained bands were  
561 quantified using ImageJ. For the conditional V5-AID degron strains, degradation of V5-AID-  
562 fused Brn1 protein was induced by addition of 0.5 mM indole-3-acetic acid (Auxin, Sigma #  
563 13750).

564

### 565 **Author contributions**

566 Conceptualization, M.L., R.D.F., and J.S.S.; Methodology, M.L., R.D.F., M.D., and J.S.S.;  
567 Software, R.D.F. and S.B.; Strain Creation and Validation, M.L., R.D.F., and M.D., Plasmid  
568 Creation and Validation, M.L., and R.D.F.; Formal Analysis, M.L., R.D.F., and S.B.; Data  
569 Curation, R.D.F.; Writing-Original Draft, M.L., R.D.F. and J.S.S.; Writing Review & Editing,  
570 M.L., R.D.F., M.D., and J.S.S.; Supervision, J.S.S. and S.B.; Project Administration, J.S.S.;  
571 Funding Acquisition, J.S.S.

572

### 573 **Acknowledgments**

574 We thank Job Dekker, Jon Belton, Maitreya Dunham, Ivan Liachko, Maxim Imakev, and Anton  
575 Goloborodko for advice on Hi-C protocols and analysis methods. We also thank James Haber,  
576 Andrew Murray, Jasper Rine, Jessica Tyler, Alan Hinnebusch, Marc Gartenberg, Dan  
577 Gottschling, and Vincent Guacci for kindly providing yeast strains, plasmids, or antibodies. We  
578 thank David Auble and Patrick Grant for reading the manuscript and providing suggestions prior  
579 to submission. We declare no conflicts of interest.

580

### 581 **References**

- 582 1. Haber JE. Mating-type genes and *MAT* switching in *Saccharomyces cerevisiae*. *Genetics*.  
583 2012;191(1):33-64. PMID: 22555442.
- 584 2. Haber JE, George JP. A mutation that permits the expression of normally silent copies of  
585 mating-type information in *Saccharomyces cerevisiae*. *Genetics*. 1979;93(1):13-35. PMID:  
586 16118901.
- 587 3. Klar AJ, Fogel S, Macleod K. *MARI-A* regulator of the *HMa* and *HMa* loci in  
588 *Saccharomyces cerevisiae*. *Genetics*. 1979;93(1):37-50. PMID: 17248968.

- 589 4. Rine J. Regulation and Transposition of Cryptic Mating Type Genes in *Saccharomyces*  
590 *cerevisiae*. Eugene, OR: University of Oregon; 1979.
- 591 5. Gartenberg MR, Smith JS. The nuts and bolts of transcriptionally silent chromatin in  
592 *Saccharomyces cerevisiae*. *Genetics*. 2016;203(4):1563-99. PMID: 27516616.
- 593 6. Strathern JN, Klar AJ, Hicks JB, Abraham JA, Ivy JM, Nasmyth KA, et al. Homothallic  
594 switching of yeast mating type cassettes is initiated by a double-stranded cut in the *MAT* locus.  
595 *Cell*. 1982;31(1):183-92. PMID: 6297747.
- 596 7. Haber JE, Rogers DT, McCusker JH. Homothallic conversions of yeast mating-type  
597 genes occur by intrachromosomal recombination. *Cell*. 1980;22(1 Pt 1):277-89. PMID: 6253081.
- 598 8. Nasmyth K. The determination of mother cell-specific mating type switching in yeast by  
599 a specific regulator of HO transcription. *EMBO J*. 1987;6(1):243-8. PMID: 15981333.
- 600 9. Klar AJ, Hicks JB, Strathern JN. Directionality of yeast mating-type interconversion.  
601 *Cell*. 1982;28(3):551-61. PMID: 7042099.
- 602 10. Wu X, Haber JE. A 700 bp cis-acting region controls mating-type dependent  
603 recombination along the entire left arm of yeast chromosome III. *Cell*. 1996;87(2):277-85.  
604 PMID: 8861911.
- 605 11. Sun K, Coic E, Zhou Z, Durrens P, Haber JE. *Saccharomyces* forkhead protein Fkh1  
606 regulates donor preference during mating-type switching through the recombination enhancer.  
607 *Genes Dev*. 2002;16(16):2085-96. PMID: 12183363.
- 608 12. Wu C, Weiss K, Yang C, Harris MA, Tye BK, Newlon CS, et al. Mcm1 regulates donor  
609 preference controlled by the recombination enhancer in *Saccharomyces* mating-type switching.  
610 *Genes Dev*. 1998;12(11):1726-37. PMID: 9620858.

- 611 13. Szeto L, Fafalios MK, Zhong H, Vershon AK, Broach JR.  $\alpha$ 2p controls donor preference  
612 during mating type interconversion in yeast by inactivating a recombinational enhancer of  
613 chromosome III. *Genes Dev.* 1997;11(15):1899-911. PMID: 9271114.
- 614 14. Dummer AM, Su Z, Cherney R, Choi K, Denu J, Zhao X, et al. Binding of the Fkh1  
615 forkhead associated domain to a phosphopeptide within the Mph1 DNA helicase regulates  
616 mating-type switching in budding yeast. *PLoS Genet.* 2016;12(6):e1006094. PMID: 27257873.
- 617 15. Li J, Coic E, Lee K, Lee CS, Kim JA, Wu Q, et al. Regulation of budding yeast mating-  
618 type switching donor preference by the FHA domain of Fkh1. *PLoS Genet.* 2012;8(4):e1002630.  
619 PMID: 22496671.
- 620 16. Jensen R, Sprague GF, Jr., Herskowitz I. Regulation of yeast mating-type  
621 interconversion: feedback control of *HO* gene expression by the mating-type locus. *Proc Natl*  
622 *Acad Sci U S A.* 1983;80(10):3035-9. PMID: 6344075.
- 623 17. Klar AJ, Hicks JB, Strathern JN. Irregular transpositions of mating-type genes in yeast.  
624 *Cold Spring Harb Symp Quant Biol.* 1981;45 Pt 2:983-90. PMID: 6266771.
- 625 18. Nasmyth KA. The regulation of yeast mating-type chromatin structure by SIR: an action  
626 at a distance affecting both transcription and transposition. *Cell.* 1982;30(2):567-78. PMID:  
627 6215985.
- 628 19. Li M, Valsakumar V, Poorey K, Bekiranov S, Smith JS. Genome-wide analysis of  
629 functional sirtuin chromatin targets in yeast. *Genome Biol.* 2013;14(5):R48. PMID: 23710766.
- 630 20. D'Ambrosio C, Schmidt CK, Katou Y, Kelly G, Itoh T, Shirahige K, et al. Identification  
631 of cis-acting sites for condensin loading onto budding yeast chromosomes. *Genes Dev.*  
632 2008;22(16):2215-27. PMID: 18708580.

- 633 21. Teytelman L, Thurtle DM, Rine J, van Oudenaarden A. Highly expressed loci are  
634 vulnerable to misleading ChIP localization of multiple unrelated proteins. *Proc Natl Acad Sci U*  
635 *S A*. 2013;110(46):18602-7. PMID: 24173036.
- 636 22. Bhalla N, Biggins S, Murray AW. Mutation of *YCS4*, a budding yeast condensin subunit,  
637 affects mitotic and nonmitotic chromosome behavior. *Mol Biol Cell*. 2002;13(2):632-45. PMID:  
638 11854418.
- 639 23. Wilson BA, Masel J. Putatively noncoding transcripts show extensive association with  
640 ribosomes. *Genome Biol Evol*. 2011;3:1245-52. PMID: 21948395.
- 641 24. Szeto L, Broach JR. Role of  $\alpha 2$  protein in donor locus selection during mating type  
642 interconversion. *Mol Cell Biol*. 1997;17(2):751-9. PMID: 9001229.
- 643 25. Ercan S, Reese JC, Workman JL, Simpson RT. Yeast recombination enhancer is  
644 stimulated by transcription activation. *Mol Cell Biol*. 2005;25(18):7976-87. PMID: 16135790.
- 645 26. Yang L, Duff MO, Graveley BR, Carmichael GG, Chen LL. Genomewide  
646 characterization of non-polyadenylated RNAs. *Genome Biol*. 2011;12(2):R16. PMID: 21324177.
- 647 27. Tamburini BA, Tyler JK. Localized histone acetylation and deacetylation triggered by the  
648 homologous recombination pathway of double-strand DNA repair. *Mol Cell Biol*.  
649 2005;25(12):4903-13. PMID: 15923609.
- 650 28. Heinz S, Benner C, Spann N, Bertolino E, Lin YC, Laslo P, et al. Simple combinations of  
651 lineage-determining transcription factors prime cis-regulatory elements required for macrophage  
652 and B cell identities. *Mol Cell*. 2010;38(4):576-89. PMID: 20513432.
- 653 29. Miele A, Bystricky K, Dekker J. Yeast silent mating type loci form heterochromatic  
654 clusters through silencer protein-dependent long-range interactions. *PLoS Genet*.  
655 2009;5(5):e1000478. PMID: 19424429.

- 656 30. Imakaev M, Fudenberg G, McCord RP, Naumova N, Goloborodko A, Lajoie BR, et al.  
657 Iterative correction of Hi-C data reveals hallmarks of chromosome organization. *Nat Methods*.  
658 2012;9(10):999-1003. PMID: 22941365.
- 659 31. Nishimura K, Fukagawa T, Takisawa H, Kakimoto T, Kanemaki M. An auxin-based  
660 degron system for the rapid depletion of proteins in nonplant cells. *Nat Methods*.  
661 2009;6(12):917-22. PMID: 19915560.
- 662 32. Coic E, Richard GF, Haber JE. *Saccharomyces cerevisiae* donor preference during  
663 mating-type switching is dependent on chromosome architecture and organization. *Genetics*.  
664 2006;173(3):1197-206. PMID: 16624909.
- 665 33. Wu X, Haber JE. *MATa* donor preference in yeast mating-type switching: activation of a  
666 large chromosomal region for recombination. *Genes Dev*. 1995;9(15):1922-32. PMID: 7649475.
- 667 34. Belton JM, Lajoie BR, Audibert S, Cantaloube S, Lassadi I, Goiffon I, et al. The  
668 Conformation of yeast chromosome III is mating type dependent and controlled by the  
669 recombination enhancer. *Cell Rep*. 2015;13(9):1855-67. PMID: 26655901.
- 670 35. Li Q, Peterson KR, Fang X, Stamatoyannopoulos G. Locus control regions. *Blood*.  
671 2002;100(9):3077-86. PMID: 12384402.
- 672 36. Dodson AE, Rine J. Donor preference meets heterochromatin: Moonlighting activities of  
673 a recombinational enhancer in *Saccharomyces cerevisiae*. *Genetics*. 2016;204(1):177-90. PMID:  
674 27655944.
- 675 37. Ganji M, Shaltiel IA, Bisht S, Kim E, Kalichava A, Haering CH, et al. Real-time imaging  
676 of DNA loop extrusion by condensin. *Science*. 2018;360(6384):102-5. PMID: 29472443.

- 677 38. Bystricky K, Van Attikum H, Montiel MD, Dion V, Gehlen L, Gasser SM. Regulation of  
678 nuclear positioning and dynamics of the silent mating type loci by the yeast Ku70/Ku80  
679 complex. *Mol Cell Biol.* 2009;29(3):835-48. PMID: 19047366.
- 680 39. Messenguy F, Dubois E. Role of MADS box proteins and their cofactors in combinatorial  
681 control of gene expression and cell development. *Gene.* 2003;316:1-21. PMID: 14563547.
- 682 40. Wang BD, Eyre D, Basrai M, Lichten M, Strunnikov A. Condensin binding at distinct  
683 and specific chromosomal sites in the *Saccharomyces cerevisiae* genome. *Mol Cell Biol.*  
684 2005;25(16):7216-25. PMID: 16055730.
- 685 41. Bobola N, Jansen RP, Shin TH, Nasmyth K. Asymmetric accumulation of Ash1p in  
686 postanaphase nuclei depends on a myosin and restricts yeast mating-type switching to mother  
687 cells. *Cell.* 1996;84(5):699-709. PMID: 8625408.
- 688 42. Sil A, Herskowitz I. Identification of asymmetrically localized determinant, Ash1p,  
689 required for lineage-specific transcription of the yeast *HO* gene. *Cell.* 1996;84(5):711-22. PMID:  
690 8625409.
- 691 43. Linke C, Klipp E, Lehrach H, Barberis M, Krobisch S. Fkh1 and Fkh2 associate with  
692 Sir2 to control *CLB2* transcription under normal and oxidative stress conditions. *Front Physiol.*  
693 2013;4:173. PMID: 23874301.
- 694 44. Long RM, Singer RH, Meng X, Gonzalez I, Nasmyth K, Jansen RP. Mating type  
695 switching in yeast controlled by asymmetric localization of *ASH1* mRNA. *Science.*  
696 1997;277(5324):383-7. PMID: 9219698.
- 697 45. Sutani T, Sakata T, Nakato R, Masuda K, Ishibashi M, Yamashita D, et al. Condensin  
698 targets and reduces unwound DNA structures associated with transcription in mitotic  
699 chromosome condensation. *Nat Commun.* 2015;6:7815. PMID: 26204128.

- 700 46. Toselli-Mollereau E, Robellet X, Fauque L, Lemaire S, Schiklenk C, Klein C, et al.  
701 Nucleosome eviction in mitosis assists condensin loading and chromosome condensation.  
702 EMBO J. 2016;35(14):1565-81. PMID: 27266525.
- 703 47. Storici F, Lewis LK, Resnick MA. *In vivo* site-directed mutagenesis using  
704 oligonucleotides. Nat Biotechnol. 2001;19(8):773-6. PMID: 11479573.
- 705 48. Langmead B, Trapnell C, Pop M, Salzberg SL. Ultrafast and memory-efficient alignment  
706 of short DNA sequences to the human genome. Genome Biol. 2009;10(3):R25. PMID:  
707 19261174.
- 708 49. Quinlan AR, Hall IM. BEDTools: a flexible suite of utilities for comparing genomic  
709 features. Bioinformatics. 2010;26(6):841-2. PMID: 20110278.
- 710 50. Liu T. Use model-based analysis of ChIP-Seq (MACS) to analyze short reads generated  
711 by sequencing protein-DNA interactions in embryonic stem cells. Methods Mol Biol.  
712 2014;1150:81-95. PMID: 24743991.
- 713 51. Belton JM, Dekker J. Measuring chromatin structure in budding yeast. Cold Spring Harb  
714 Protoc. 2015;2015(7):614-8. PMID: 26134912.
- 715 52. Burton JN, Liachko I, Dunham MJ, Shendure J. Species-level deconvolution of  
716 metagenome assemblies with Hi-C-based contact probability maps. G3 (Bethesda).  
717 2014;4(7):1339-46. PMID: 24855317.
- 718 53. Porter DF, Koh YY, VanVeller B, Raines RT, Wickens M. Target selection by natural  
719 and redesigned PUF proteins. Proc Natl Acad Sci U S A. 2015;112(52):15868-73. PMID:  
720 26668354.



721 54. Swamy KB, Lin CH, Yen MR, Wang CY, Wang D. Examining the condition-specific  
722 antisense transcription in *S. cerevisiae* and *S. paradoxus*. BMC Genomics. 2014;15:521. PMID:  
723 24965678.

724 55. Li M, Petteys BJ, McClure JM, Valsakumar V, Bekiranov S, Frank EL, et al. Thiamine  
725 biosynthesis in *Saccharomyces cerevisiae* is regulated by the NAD<sup>+</sup>-dependent histone  
726 deacetylase Hst1. Mol Cell Biol. 2010;30(13):3329-41. PMID: 20439498.

727

## 728 **Figure captions**

729 **Fig 1. *MATa*-specific binding of Sir2 and condensin to the recombination enhancer (RE).**

730 **(A)** Chip-seq of Smc4-myc, Sir2-myc, and nuclear localized GFP in WT and *sir2Δ* backgrounds.

731 The left arm of chromosome III is depicted from *HML* to *SPB1*. RE indicates the recombination  
732 enhancer region. Inset: The minimal 700bp RE element required for donor preference is

733 indicated, as are the two Mcm1/ $\alpha$ 2 binding sites (DPS1 and DPS2) and *RDT1*. **(B)** Sir2 ChIP at  
734 the RE, *HML-I* silencer, and *SPB1*. **(C)**  $\alpha$ -Myc ChIP of Brn1-myc and Smc4-myc at the RE. **(D)**

735 ChIP showing *MATa*-specific binding of Sir2 to the RE. **(E)** ChIP showing *MATa*-specific

736 binding of Brn1-myc to the RE. **(F)** Brn1-Myc ChIP at RE is not Sir2 dependent. **(G)** Native Sir2

737 ChIP at RE is not condensin dependent. ChIP signal relative to input is plotted as the mean of  
738 three replicates. Error bars = standard deviation. (\*\*p<0.005).

739

740 **Fig 2. *RDT1* is a novel Sir2 regulated gene** **(A)** Schematic of RE locus depicting

741 Sir2/Condensin peak location relative to previously reported R1L/S and R2 RNA (*RDT1*). **(B)**

742 *RDT1* mRNA expression is *MATa* specific. **(C)** H4K16ac ChIP at RE in SIR complex null

743 strains. **(D)** H4K16ac deacetylation is dependent on Sir2 catalytic activity. A *sir2Δ* strain was

744 transformed with the indicated plasmids and ChIP assays performed. **(E)** Differential *RDT1*  
745 transcriptional regulation by *SIR2* is dependent on *HML* status. **(F)** Effect of *sir2Δ* on  
746 H3K9/K14ac ChIP at the *RDT1* promoter in *HML* and *hmlΔ* backgrounds. **(G)** Effects of the  
747 temperature sensitive *yca4-1* mutation on *RDT1* expression in *HML* and *hmlΔ* backgrounds.  
748 (\* $p < 0.05$ ; \*\* $p < 0.005$ ).

749

750 **Fig 3. Identification of a 100bp sequence that recruits Sir2/condensin and represses RDT1**  
751 **expression.** **(A)** Schematic indicating a 100bp deletion that covers the condensin (red) and Sir2  
752 (blue) peaks. **(B)** ChIP of Sir2 in the 100bp $\Delta$  mutant (ML275). **(C)** ChIP of Brn1-Myc in the  
753 100bp $\Delta$  mutant. **(D)** *RDT1* transcription in *MAT $\alpha$*  cells is derepressed in the 100bp $\Delta$  mutant. **(E)**  
754 Western blot of Rdt1-13xMyc in WT *MAT $\alpha$*  and *MAT $\alpha$*  cells, as well as the *MAT $\alpha$*  100bp $\Delta$   
755 mutant. **(F)** *RDT1* and R1 expression when using oligo dT priming for the reverse transcription  
756 step. **(G)** *RDT1* and R1 expression when using random hexamer priming for reverse  
757 transcription. (\*\* $p < 0.005$ ).

758

759 **Fig 4. Dynamics of Sir2 and condensin binding at the *RDT1* promoter and *MAT $\alpha$*  locus**  
760 **during mating-type switching.** **(A, B)** Mating-type switching time course where HO was  
761 induced by galactose at time 0, then glucose added at 2 hr to stop HO expression and allow for  
762 break repair. Switching is maximal at 3 hr [27]. **(C)** ChIP of Sir2 at the *RDT1* promoter and the  
763 HO-induced DSB (*MAT-HO*). **(D)** qRT-PCR of *RDT1* expression across the mating-type  
764 switching time course. **(E)** Rdt1-13xMyc protein expression across the same time course. **(F)**  
765 ChIP of Brn1-myc at the *RDT1* promoter and *MAT-HO* break site across the same time course.  
766 (\* $p < 0.05$ , \*\* $p < 0.005$  compared to time 0).

767

768 **Fig 5. The Sir2/condensin binding site controls chromosome III architecture.**

769 **(A)** Frequency of significant Hi-C interaction changes identified using HOMER for each  
770 chromosome in the *sir2*Δ (ML25) and 100bpΔ (ML275) strains compared to WT (ML1). **(B)**  
771 HOMER-generated observed/expected Hi-C interaction frequency heat maps (10kb bins) for  
772 chromosome III. **(C)** qPCR detection of *HML-HMR* interaction using 3C analysis. (\*p < 0.05,  
773 \*\*<0.005). **(D)** Iteratively corrected and read-normalized Hi-C heat maps revealing an  
774 interaction between *HMR* (bin 29) and *MATa* (bin 20) in the *sir2*Δ and 100bpΔ mutants. **(E)**  
775 Summary of large-scale changes in chromosome III architecture. Δ indicates the 100bp deletion.  
776

777 **Fig 6. Loss of Sir2 and the Sir2/condensin binding site alters mating-type switching. (A)**

778 Schematic of a donor preference assay in which utilization of an artificial *HMR*α-B cassette as  
779 the donor for switching introduces a unique *Bam*HI site to the *MAT* locus. **(B)** Locations of  
780 primers flanking the *Bam*HI site used for PCR detection of *MAT*α. **(C)** Representative ethidium  
781 bromide stained agarose gel of *Bam*HI-digested *MAT*α PCR products after mating-type  
782 switching in WT (XW652), *re*Δ (XW676), *sir2*Δ (ML557), and 100bpΔ (SY742) strains. The  
783 *MAT*α-B product is digested into 2 smaller bands. **(D)** Quantifying the percentage of *MAT*α PCR  
784 product digested by *Bam*HI, from three biological replicates. ImageJ was used for the  
785 quantitation. (\*\*p < 0.005). **(E)** Time course of switching from *MATa* to *MAT*α in WT (ML447),  
786 100bpΔ (ML460), and *sir2*Δ (ML458) strains after HO was induced for 45 min and then shut  
787 down with glucose. Aliquots were harvested at 30 min intervals. *SCR1* is a control for input  
788 genomic DNA. **(F)** ImageJ quantification of *MAT*α PCR relative to *SCR1* for each time point.  
789

790 **Fig 7. Effects of condensin depletion on mating-type switching.** (A) Schematic of the time  
791 course used to deplete Brn1-AID prior to the induction of mating-type switching in the ML1  
792 strain background. Auxin was added 30 min prior to the induction of HO expression by  
793 galactose. (B) EtBr stained agarose gel of *MAT $\alpha$*  PCR products amplified from each time point  
794 during mating-type switching. *SCR1* PCR was used as a control for input DNA. (C)  
795 Quantification of the *MAT $\alpha$ /SCR1* PCR product ratio across the time course from 3 biological  
796 replicates. (D) Effect of Brn1-AID depletion on mating-type switching donor preference. A  
797 representative biological replicate is shown, along with quantitation of switching using the  
798 *HMR $\alpha$ -B* cassette.

799

## 800 **Supporting Figure and Table Captions**

801 **Fig S1. *MAT $\alpha$* -specific transcription of *RDT1* is repressed by Sir2 and Hst1.** (A) IGV  
802 screenshot of compiled raw RNA-seq read data from BY4741 (*MAT $\alpha$* ) and BY4742 (*MAT $\alpha$* )  
803 strains. The top two blue peaks represent Smc4-myc and Sir2-myc ChIP-seq reads. (B)  
804 Quantitative ChIP assay showing additional SIR complex subunit enrichment at the *RDT1*  
805 promoter. (C) RT-qPCR showing effects of deleting *SIR2* and/or *HST1* on *RDT1* expression  
806 when HML is present or deleted (\* $p < 0.05$ , \*\* $p < .005$ ).

807

808 **Fig S2. Deletion of Sir2 or the *RDT1* promoter Sir2/condensin binding site does not affect**  
809 **protein levels of Sir2 or Myc-tagged condensin subunits.** (A) Western blot showing steady  
810 state Sir2 protein levels in WT (ML1), *sir2 $\Delta$*  (ML25), and 100bp $\Delta$  (ML275) strains. (B) Western  
811 blot with anti-Myc detection of Brn1-13xMyc or Sir2 in WT (ML149), *sir2 $\Delta$*  (ML161), and

812 100bp $\Delta$  (ML322) strains. (C) Western blot with anti-Myc detection of Smc4-13xMyc or Sir2 in  
813 WT (ML152), *sir2* $\Delta$  (ML160), and 100bp $\Delta$  version.

814

815 **Fig S3. The *RDT1*-proximal Mcm1/a2 binding site (DPS2) is important for Sir2 and**  
816 **condensin recruitment. (A)** Schematic diagram depicting the location of the DPS2 sequence  
817 deletion relative to other elements with the RE, with the deleted chromosome III coordinates  
818 indicated in red. (B) Quantitative ChIP of native Sir2 in WT and *dps2* $\Delta$  strains. (C) Quantitative  
819 ChIP of Brn1-Myc in WT and *dps2* $\Delta$  strains. @*RDT1* promoter indicates enrichment at the  
820 Sir2/condensin peak (\*\*p<0.005).

821

822 **Fig S4. Deleting the Sir2/condensin binding site within the RE (100bp $\Delta$ ) does not alter Sir2**  
823 **function at *HML* $\alpha$ . (A)** Quantitative mating assay for WT (ML1) and 100bp $\Delta$  (ML275) strains.  
824 (B) Quantitative ChIP assay showing Sir2 enrichment at *HML-I* in WT (ML1) and 100bp $\Delta$   
825 (ML275) strains. (\*\*p<0.005).

826

827 **Fig S5. Auxin inducible degron (AID)-mediated depletion of Brn1 does not derepress *RDT1***  
828 **or *HML* $\alpha$ . (A)** Western blot time course of auxin induced degradation of Brn1::V5-AID. Time  
829 indicates minutes after addition of auxin. (B) RT-qPCR of *RDT1* expression following 30 or 60  
830 minutes of Brn1 depletion by auxin. (C) RT-qPCR of *HMLALPHA2* expression following 30 or  
831 60 min of Brn1 depletion by auxin.

832

833 **Table S1. Genes closest to Sir2-dependent condensin peaks.** This Excel spreadsheet lists the  
834 systematic ORF names of all genes that were closest to Sir2-dependent condensin peaks, as  
835 chosen using MACS.

836

837 **Table S2. Yeast Strains.** List of all *Saccharomyces cerevisiae* strains used in this study, along  
838 with their genotypes and source.

839

840 **Table S3. Oligonucleotides.** List of oligodeoxynucleotides used in this study.

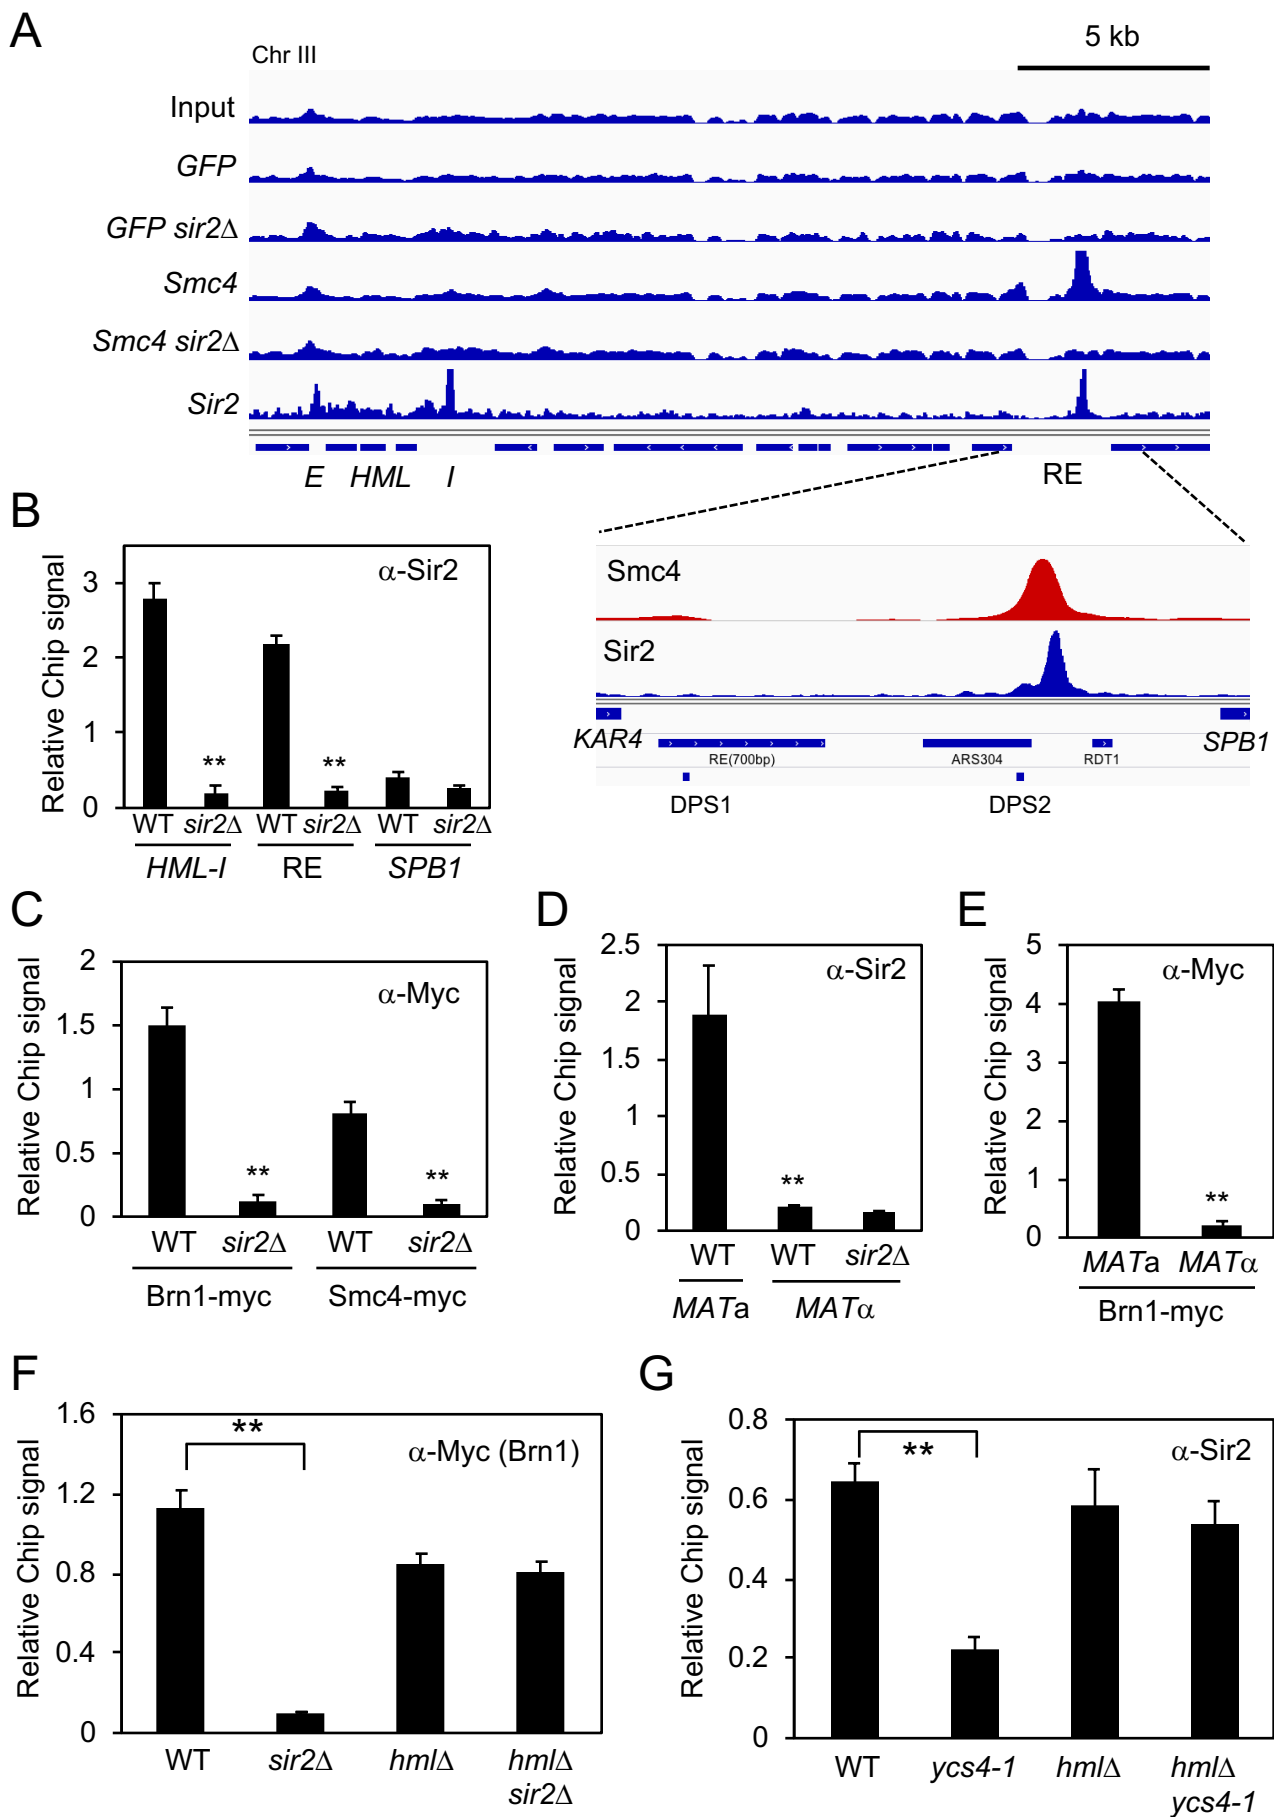

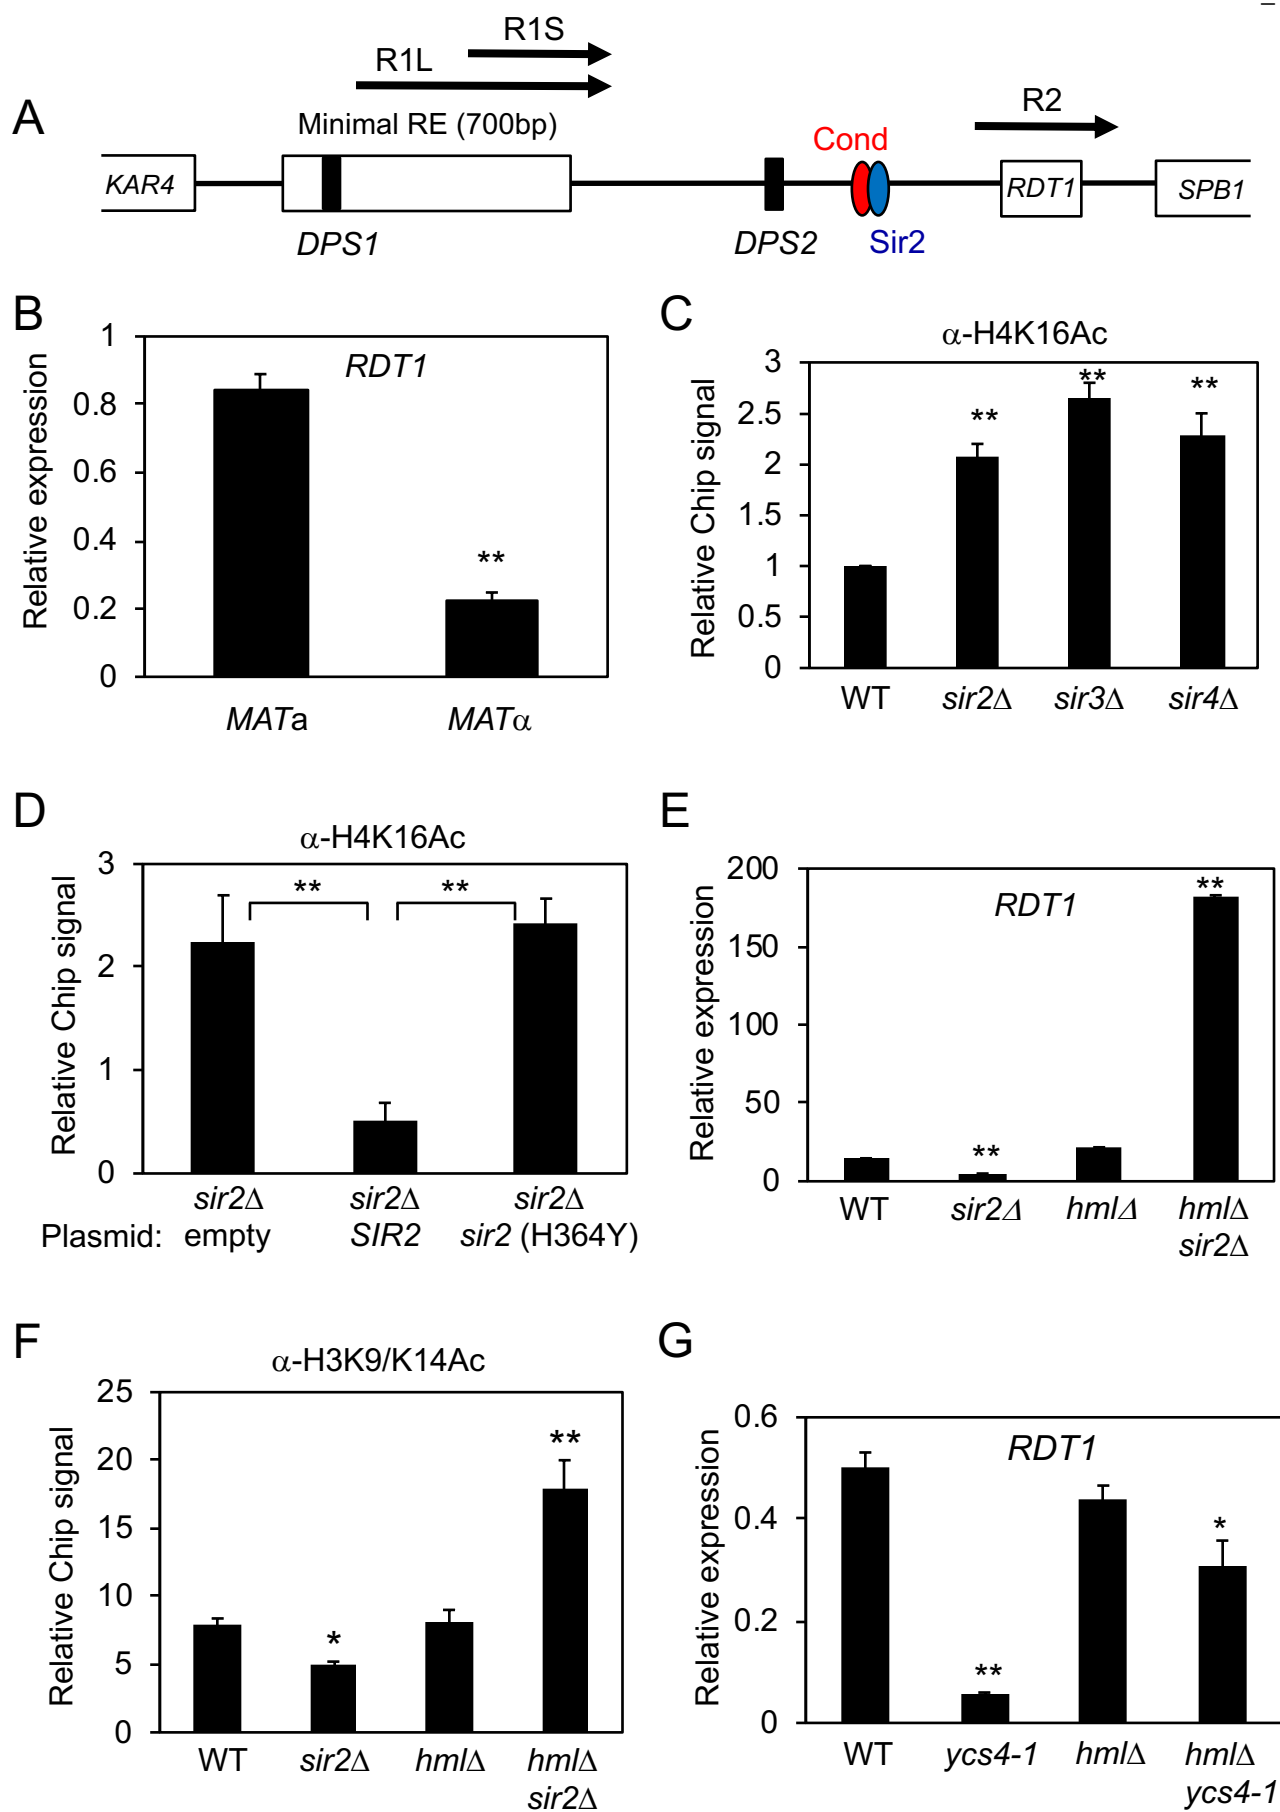



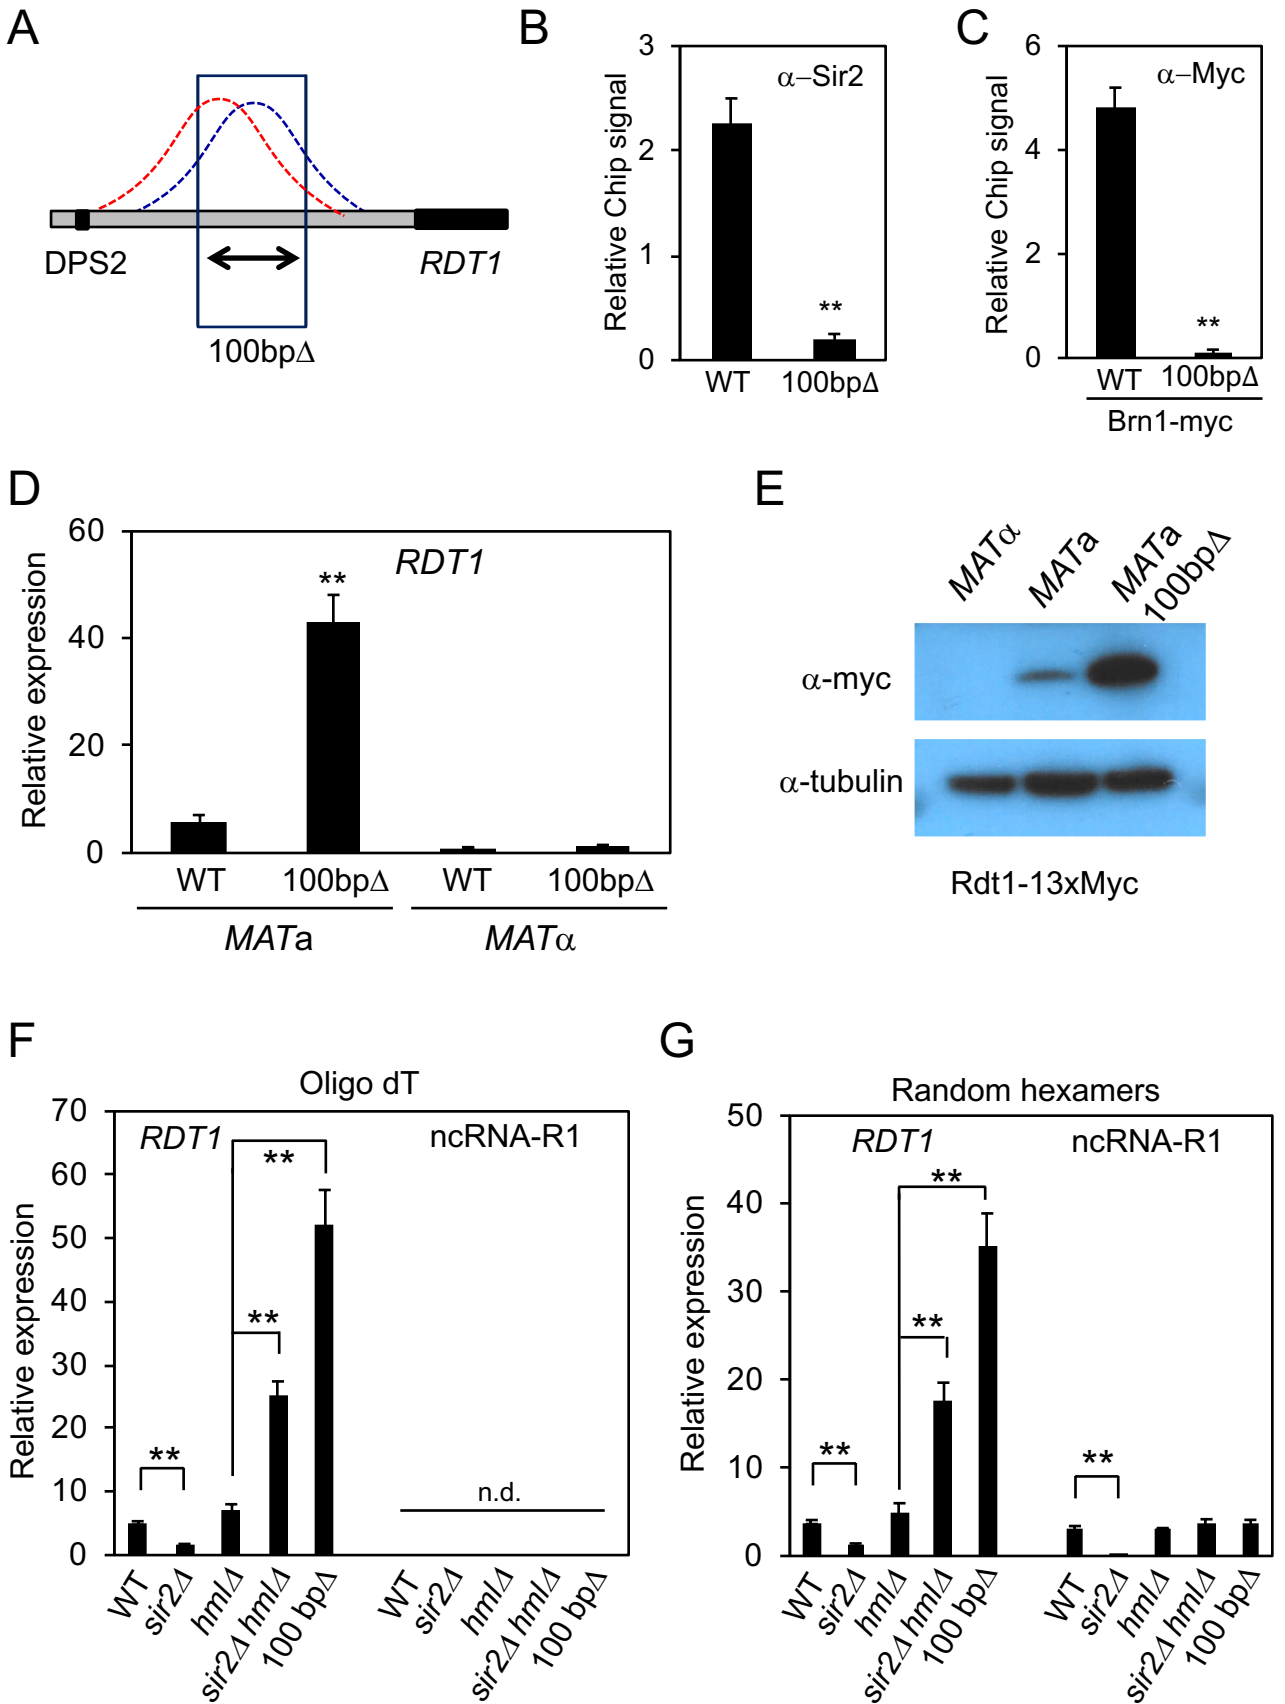

A

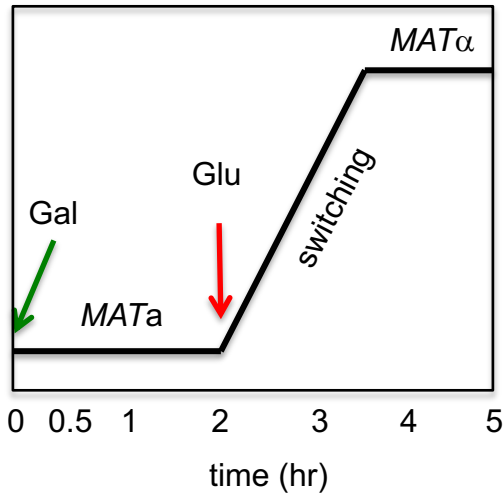

B

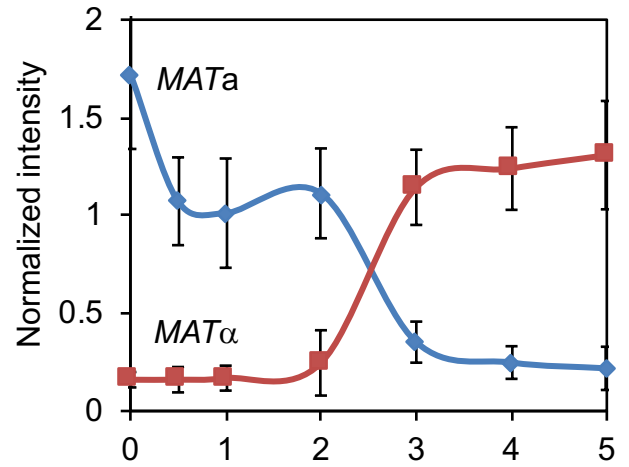

C

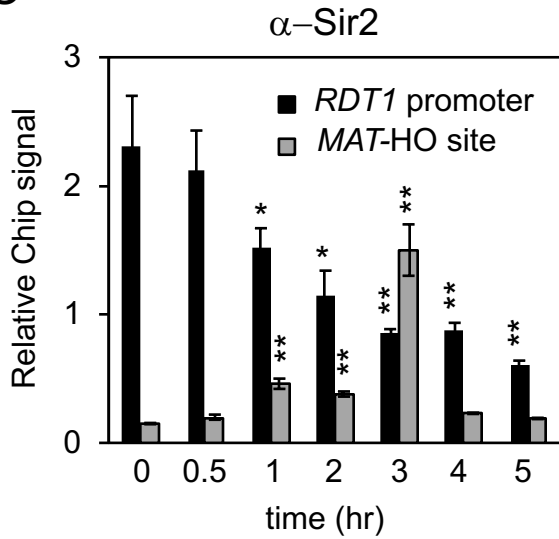

D

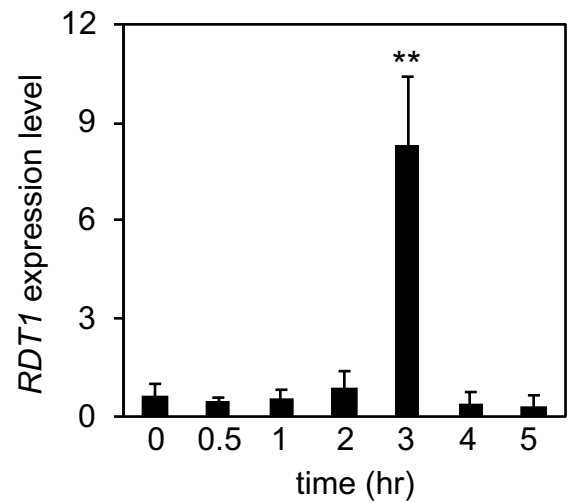

E

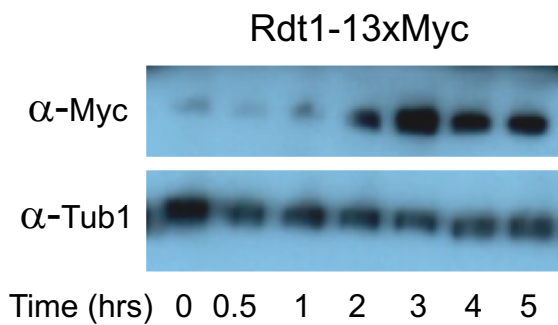

F

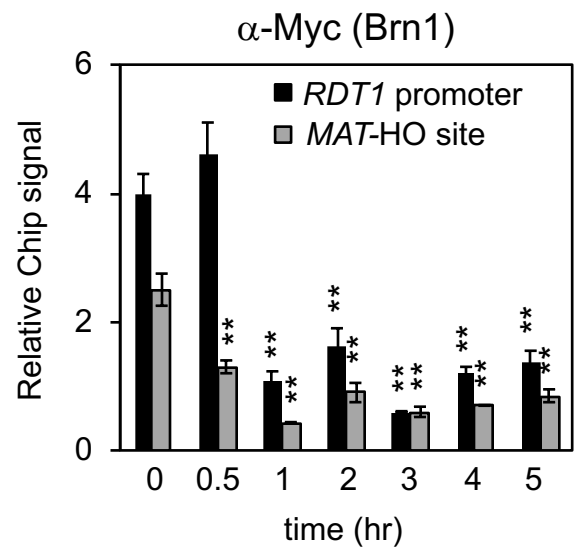

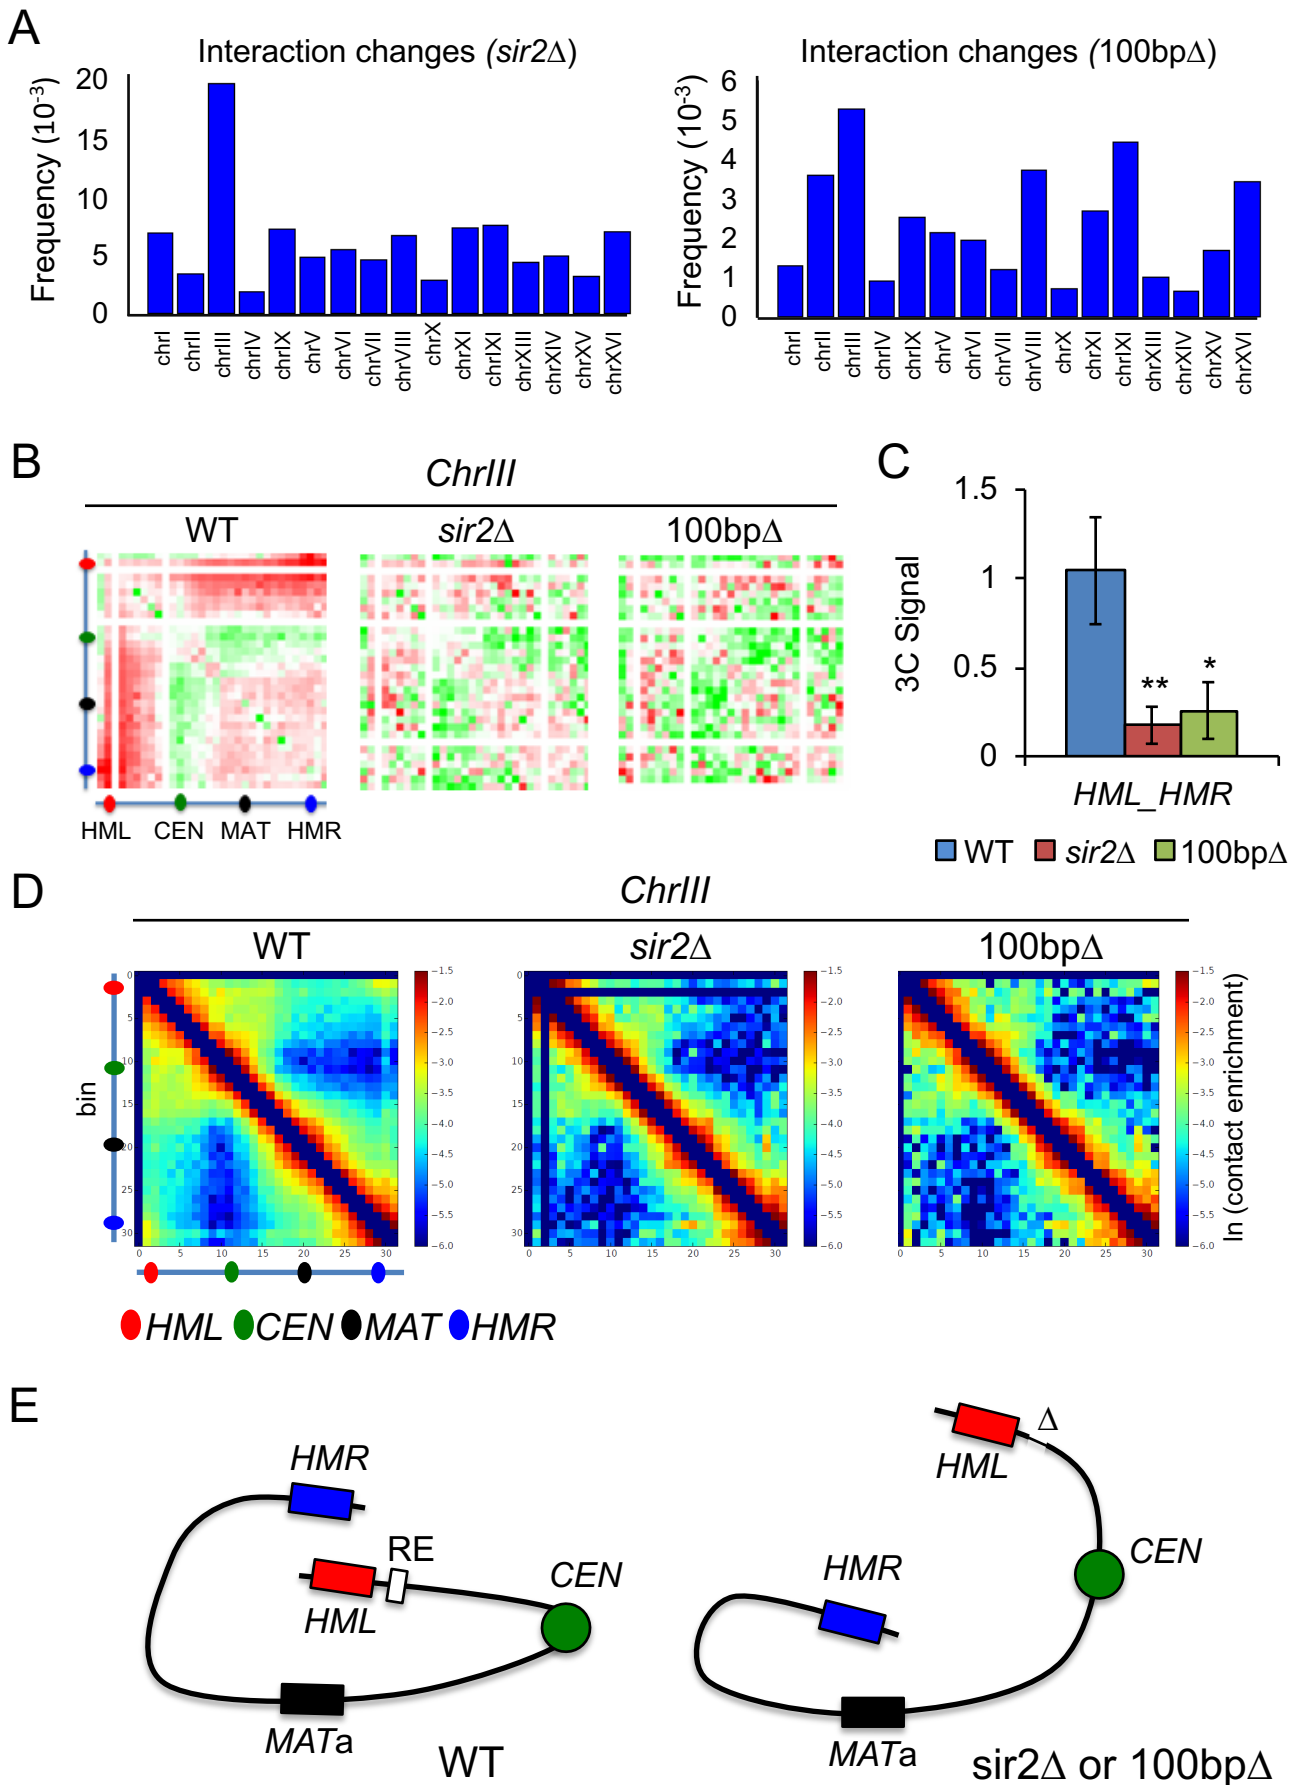

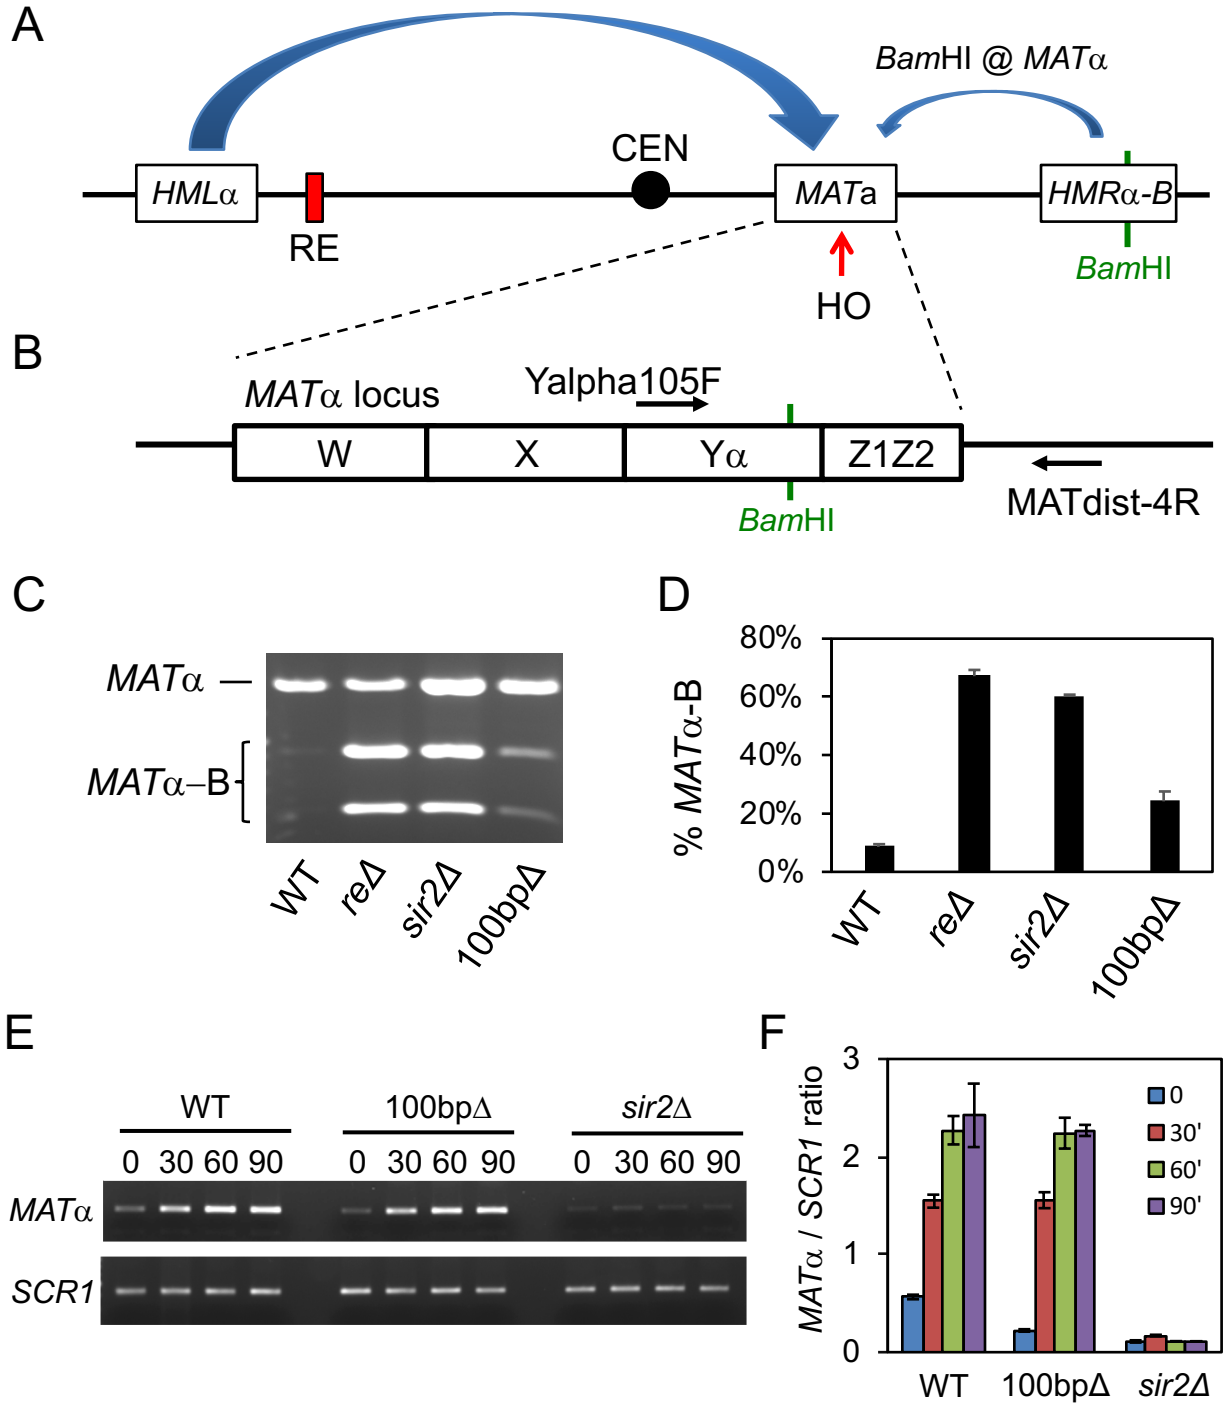

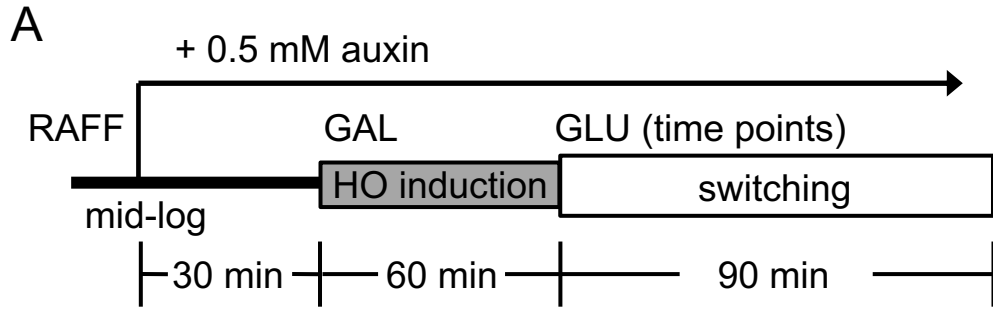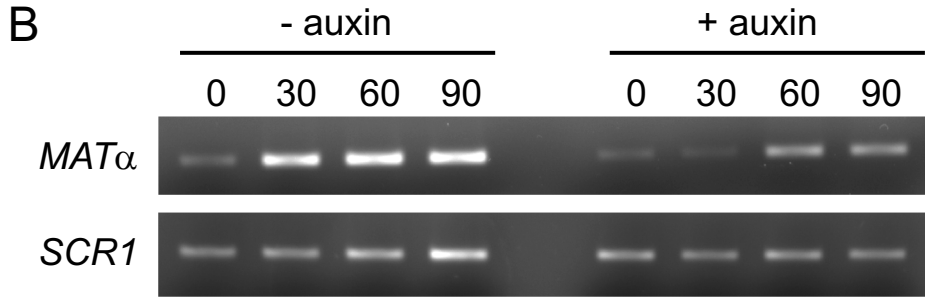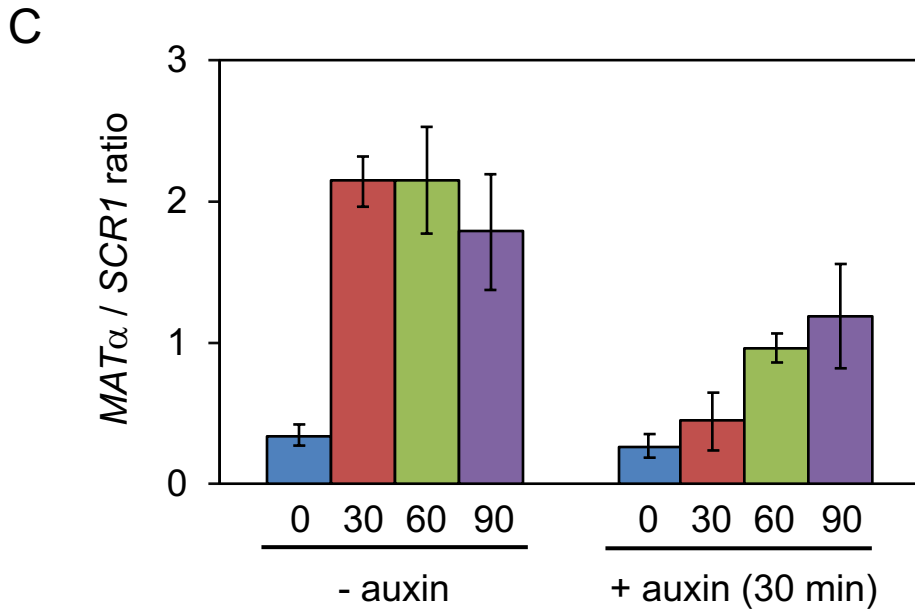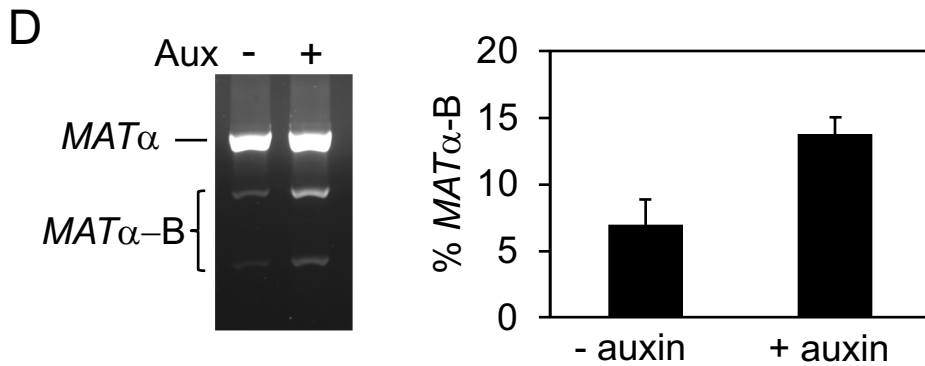

Source: https://www.biorxiv.org/content/10.1101/558494v1.full.pdf
