# Supplementary material for: A Sir2-regulated locus control region in the recombination enhancer of Saccharomyces cerevisiae specifies chromosome III structure
Source: bioRxiv or medRxiv preprint supplement (doi:10.1101/558494), 2019-02-22

## Supplemental Information (Li et al.)

### Supplemental Table S1. Genes closest to Sir2-dependent condensin peaks.

(See Excel file).

### Supplemental Table S2. Yeast Strains

| Strains | Genotype                                                                               | Source     |
|---------|----------------------------------------------------------------------------------------|------------|
| ML1     | <i>MATa his3Δ200 leu2Δ1 met15Δ0 trp1Δ63 ura3-167</i>                                   | [1]        |
| ML25B12 | <i>MATα his3Δ200 leu2Δ1 met15Δ0 trp1Δ63 ura3-167</i>                                   | This study |
| ML25    | <i>MATa his3Δ200 leu2Δ1 met15Δ0 trp1Δ63 ura3-167 sir2Δ::kanMX4</i>                     | [1]        |
| ML26    | <i>MATa his3Δ200 leu2Δ1 met15Δ0 trp1Δ63 ura3-167 sir3Δ::kanMX4</i>                     | [1]        |
| ML27    | <i>MATa his3Δ200 leu2Δ1 met15Δ0 trp1Δ63 ura3-167 sir4Δ::kanMX4</i>                     | [1]        |
| ML28    | <i>MATα his3Δ200 leu2Δ1 met15Δ0 trp1Δ63 ura3-167 sir2Δ::kanMX4</i>                     | This study |
| ML149   | <i>MATa his3Δ200 leu2Δ1 met15Δ0 trp1Δ63 ura3-167 BRN1::13xMyc-kanMX4</i>               | [2]        |
| ML152   | <i>MATa his3Δ200 leu2Δ1 met15Δ0 trp1Δ63 ura3-167 SMC4::13xMyc-kanMX4</i>               | [2]        |
| ML160   | <i>MATa his3Δ200 leu2Δ1 met15Δ0 trp1Δ63 ura3-167 SMC4::13xMyc-kanMX4 sir2Δ::natMX4</i> | [2]        |
| ML161   | <i>MATa his3Δ200 leu2Δ1 met15Δ0 trp1Δ63 ura3-167 BRN1::13xMyc-kanMX4 sir2Δ::natMX4</i> | [2]        |
| ML195   | <i>MATa his3Δ200 leu2Δ1 met15Δ0 trp1Δ63 ura3-167 sir2Δ::kanMX4 [pRS315]</i>            | This study |
| ML196   | <i>MATa his3Δ200 leu2Δ1 met15Δ0 trp1Δ63 ura3-167 sir2Δ::kanMX4 [pRS315-SIR2]</i>       | This study |
| ML197   | <i>MATa his3Δ200 leu2Δ1 met15Δ0 trp1Δ63 ura3-167 sir2Δ::kanMX4 [pRS315-sir2-H364Y]</i> | This study |
| ML275   | ML1 deleted for the 100bp Sir2/condensin binding site (100bpΔ)                         | This study |
| ML279   | ML275 made <i>sir2Δ::kanMX4</i>                                                        | This study |
| ML286   | ML25B12 deleted for the 100bp Sir2/condensin binding site (100bpΔ)                     | This study |
| ML322   | ML149 deleted for the 100bp Sir2/condensin binding site (100bpΔ)                       | This study |

|        |                                                                                                                                                                                                                                     |            |
|--------|-------------------------------------------------------------------------------------------------------------------------------------------------------------------------------------------------------------------------------------|------------|
| ML337  | <i>MAT<math>\alpha</math> his3<math>\Delta</math>200 leu2<math>\Delta</math>1 met15<math>\Delta</math>0 trp1<math>\Delta</math>63 ura3-167<br/>BRN1::13xMyc-kanMX4</i>                                                              | This study |
| ML339  | <i>MAT<math>\alpha</math> his3<math>\Delta</math>200 leu2<math>\Delta</math>1 met15<math>\Delta</math>0 trp1<math>\Delta</math>63 ura3-167<br/>SMC4::13xMyc-kanMX4</i>                                                              | This study |
| ML341  | <i>MAT<math>\alpha</math> his3<math>\Delta</math>200 leu2<math>\Delta</math>1 met15<math>\Delta</math>0 trp1<math>\Delta</math>63 ura3-167 dps2<math>\Delta</math></i>                                                              | This study |
| ML343  | <i>MAT<math>\alpha</math> his3<math>\Delta</math>200 leu2<math>\Delta</math>1 met15<math>\Delta</math>0 trp1<math>\Delta</math>63 ura3-167<br/>sir2<math>\Delta</math>::kanMX4 hml<math>\Delta</math>::LEU2</i>                     | [1]        |
| ML344  | <i>MAT<math>\alpha</math> his3<math>\Delta</math>200 leu2<math>\Delta</math>1 met15<math>\Delta</math>0 trp1<math>\Delta</math>63 ura3-167<br/>hml<math>\Delta</math>::LEU2</i>                                                     | [1]        |
| ML350  | <i>MAT<math>\alpha</math> his3<math>\Delta</math>200 leu2<math>\Delta</math>1 met15<math>\Delta</math>0 trp1<math>\Delta</math>63 ura3-167<br/>BRN1::13xMyc-kanMX4 hml<math>\Delta</math>::LEU2</i>                                 | This study |
| ML351  | <i>MAT<math>\alpha</math> his3<math>\Delta</math>200 leu2<math>\Delta</math>1 met15<math>\Delta</math>0 trp1<math>\Delta</math>63 ura3-167<br/>BRN1::13xMyc-kanMX4 sir2<math>\Delta</math>::kanMX4 hml<math>\Delta</math>::LEU2</i> | This study |
| ML419  | <i>MAT<math>\alpha</math> his3<math>\Delta</math>200 leu2<math>\Delta</math>1 met15<math>\Delta</math>0 trp1<math>\Delta</math>63 ura3-167<br/>RDT1::13xMyc-kanMX4</i>                                                              | This study |
| ML432  | ML419 deleted for the 100bp Sir2/condensin binding site (100bp $\Delta$ )                                                                                                                                                           | This study |
| ML433  | <i>MAT<math>\alpha</math> his3<math>\Delta</math>200 leu2<math>\Delta</math>1 met15<math>\Delta</math>0 trp1<math>\Delta</math>63 ura3-167<br/>RDT1::13xMyc-kanMX4</i>                                                              | This study |
| ML440  | ML1 [pGAL-HO-URA3]                                                                                                                                                                                                                  | This study |
| ML444  | ML149 [pGAL-HO-URA3]                                                                                                                                                                                                                | This study |
| ML523  | <i>MAT<math>\alpha</math> his3<math>\Delta</math>200 leu2<math>\Delta</math>1 met15<math>\Delta</math>0 trp1<math>\Delta</math>63 ura3-167<br/>BRN1::13xMyc-kanMX4 dps2<math>\Delta</math></i>                                      | This study |
| ML557  | XW652 sir2 $\Delta$ ::kanMX4                                                                                                                                                                                                        | This study |
| XW652  | <i>MAT<math>\alpha</math> ho ade3::GAL::HO HML<math>\alpha</math>RE HMR<math>\alpha</math>-B ura3-52 lys5<br/>leu2-3,112 trp1::hisG</i>                                                                                             | [3]        |
| XW676  | <i>MAT<math>\alpha</math> ho ade3::GAL::HO HML<math>\alpha</math>RE<math>\Delta</math>::URA3 HMR<math>\alpha</math>-B ade1<br/>leu2 trp1 ura3-52</i>                                                                                | [3]        |
| SY742  | XW652 deleted for the 100bp Sir2/condensin binding site (100bp $\Delta$ )                                                                                                                                                           | This study |
| NBY8   | <i>MAT<math>\alpha</math> ura3-1 leu2-3,112 his3-11 trp1-1 ade2-1 can1-100 bar1<math>\Delta</math><br/>lys2<math>\Delta</math></i>                                                                                                  | [4]        |
| NBY316 | <i>MAT<math>\alpha</math> ura3-1 leu2-3,112 his3-11 trp1-1 ade2-1 can1-100 bar1<math>\Delta</math><br/>lys2<math>\Delta</math> ycs4-1</i>                                                                                           | [4]        |
| NBY585 | <i>MAT<math>\alpha</math> ura3-1 leu2-3,112 his3-11 trp1-1 ade2-1 can1-100 bar1<math>\Delta</math><br/>lys2<math>\Delta</math> hml<math>\Delta</math>::LEU2</i>                                                                     | [4]        |
| NBY319 | <i>MAT<math>\alpha</math> ura3-1 leu2-3,112 his3-11 trp1-1 ade2-1 can1-100<br/>bar1<math>\Delta</math> lys2<math>\Delta</math> hml<math>\Delta</math>::LEU2 ycs4-1</i>                                                              | [4]        |
| RF15   | <i>MAT<math>\alpha</math> his3<math>\Delta</math>200 leu2<math>\Delta</math>1 met15<math>\Delta</math>0 trp1<math>\Delta</math>63 ura3-167[pRPL25NLS-GFP]</i>                                                                       | This study |
| RF25   | <i>MAT<math>\alpha</math> his3<math>\Delta</math>200 leu2<math>\Delta</math>1 met15<math>\Delta</math>0 trp1<math>\Delta</math>63 ura3-167<br/>sir2<math>\Delta</math>::kanMX4[pRPL25NLS-GFP]</i>                                   | This study |
| MD25   | <i>MAT<math>\alpha</math> leu2<math>\Delta</math>1 met15<math>\Delta</math>0 trp1<math>\Delta</math>63 his3<math>\Delta</math>200::pGPD1-Os TIR-</i>                                                                                | This study |

|      |                                                                   |            |
|------|-------------------------------------------------------------------|------------|
|      | <i>HIS3 BRN1-3V5-AID2:KanMx6</i> [pGAL-HO-URA3]                   |            |
| MD27 | XW652 made <i>leu2Δ1::pGPD1-Os TIR-LEU2 BRN1::3V5-AID2-KanMX6</i> | This study |

**Supplemental Table S3. Oligonucleotides**

| Oligo name | Oligo description                           | DNA sequence                                                                             |
|------------|---------------------------------------------|------------------------------------------------------------------------------------------|
| JS301      | <i>MAT</i> $\alpha$ PCR primer-1            | AGTCACATCAAGATCGTTTATGG                                                                  |
| JS302      | <i>MAT</i> $\alpha$ PCR primer-2            | GCACGGAATATGGGACTACTTCG                                                                  |
| JS467      | <i>KanMX</i> 5'-out detection               | TACGGGCGACAGTCACATCATG                                                                   |
| JS1896     | <i>SPBI</i> ORF (FW)                        | CATCGAAGTTAAGGACGACGC                                                                    |
| JS1897     | <i>SPBI</i> ORF (RV)                        | TCGCGCTTGACATTTAGACG                                                                     |
| JS1898     | Sir2 binding site 100 bp (FW)               | TGTTTGCAAGATGGTGCTTTTT                                                                   |
| JS1899     | Sir2 binding site 100 bp (RV)               | AGGAGCAGAAACGTGGCAAT                                                                     |
| JS1909     | <i>HML-I</i> silencer (ARS302) (FW)         | AACATGAAAGCCCGACGTTT                                                                     |
| JS1910     | <i>HML-I</i> silencer (ARS302) (RV)         | AATAATCGGGTGAAAAGAGGATAT                                                                 |
| JS2127     | <i>BRNI</i> _Degron_FW                      | AGTGAATTATGAGGATCTAGCGACAACACAGGCAGCG<br>TCACGGATCCCCGGGTTAATTA                          |
| JS2128     | <i>BRNI</i> _Degron_RV                      | GCACAAAAAAAAAAAAAAAAAAAAAAAAAAGATCA<br>TCAAGAATTCGAGCTCGTTTAAAC                          |
| JS2167     | 3C <i>PDCI</i> intergenic FWD               | GCCGACAGTCTGTTGAATTGG                                                                    |
| JS2168     | 3C <i>PDCI</i> intergenic REV               | GAAGCGGACCCAGACTTAAGC                                                                    |
| JS2342     | Sir2 binding site 100bp $\Delta$ pCORE (FW) | GACTTACAAGCACACCTTTGAATTATTTTTGTTCTCTAT<br>GTCCTTACCATTAAGTTGATC                         |
| JS2343     | Sir2 binding site 100bp $\Delta$ pCORE (RV) | TATATAGCTATTCATCAATTGAAATATTCATTTTATAAG<br>T GAGCTCGTTTTTCGACACTGG                       |
| JS2444     | pCORE 100bp $\Delta$ replacement (FW)       | GACTTACAAGCACACCTTTGAATTATTTTTGTTCTCTAT<br>GACTTATAAAATGAATATTTCAATTGATGAATAGCTAT<br>ATA |
| JS2445     | pCORE 100bp $\Delta$ replacement (RV)       | TATATAGCTATTCATCAATTGAAATATTCATTTTATAAG<br>TCATAGAGAACAAAATAATTCAAAGGTGTGCTTGTA<br>AGTC  |
| JS2494     | <i>RDTI</i> upstream (-258 bp) (FW)         | CGCGTTTAAAGACTTACAAGCAC                                                                  |
| JS2496     | <i>RDTI</i> upstream                        | TTAAATACATGCTGCAGTTTTTCG                                                                 |

|        |                                      |                                                                 |
|--------|--------------------------------------|-----------------------------------------------------------------|
|        | (-44 bp) (RV)                        |                                                                 |
| JS2517 | <i>RDT1</i> upstream (-19 bp) (FW)   | AAAACCTGCAGCATGTATTTAATCG                                       |
| JS2518 | <i>RDT1</i> downstream (+19 bp) (RV) | TGCTTTCGATTATTTCTGGTTCT                                         |
| JS2574 | Yalpha105F                           | GCCCACTTCTAAGCTGATTTCAATCTCTCC                                  |
| JS2575 | MATdist-4R                           | CCTGTTCTTAGCTTGTACCAGAGG                                        |
| JS2583 | <i>RDT1</i> -13xMyc_FW               | AATTCTATTTGTCCAGCAATCCGGCGCAAAGAAGACTA<br>CCGGATCCCCGGGTTAATTAA |
| JS2584 | <i>RDT1</i> -13xMyc_RV               | TTTCGATTATTTCTGGTTCTAGAAATTTTCAATACCCT<br>GAATTCGAGCTCGTTTAAAC  |
| JS2585 | <i>RDT1</i> detection                | TCTATTTGTCCAGCAATCCG                                            |
| JS2656 | 3C <i>HindIII</i> <i>HML</i>         | TTCCGAAAACCACGACGAACCAG                                         |
| JS2658 | 3C <i>HindIII</i> <i>HMR</i>         | ATGGGTCATTCTAGGTCATTCTAC                                        |
| JS2665 | <i>SCR1</i> ORF (33 bp) (FW)         | CGTTGAGAATTCTGGCCGAG                                            |
| JS2666 | <i>SCR1</i> ORF (468 bp) (RV)        | GTAAATCCTGATGGCACCGC                                            |
| JS2669 | KanC3                                | CCTCGACATCATCTGCCAGAT                                           |
| JS2703 | <i>HO</i> cut-site 600 bp (FW)       | TTGGATCTTAACAAACCGTAAAGGT                                       |
| JS2704 | <i>HO</i> cut-site 600 bp (RV)       | GGTAACTAGCAAACAAAGGAAAGTCA                                      |
| JS2712 | MATa detection (FW)                  | TTGCAACAACCTTCTTCTCCTCA                                         |
| JS2715 | Alpha2 ORF_FW                        | TTGGTTTGCAAAGAACATCG                                            |
| JS2716 | Alpha2 ORF_RV                        | CTTCTTTGCCAGAGGCTCAC                                            |
| JS2777 | R1S/R1L ncRNA (FW)                   | CGTGCAAACAGTATTCCGGC                                            |
| JS2778 | R1L/R1S ncRNA (RV)                   | GCGCTGGTTGTTATTGGCAA                                            |

## Supplemental Figure Legends

**Fig S1. *MATa*-specific transcription of *RDT1* is repressed by Sir2 and Hst1.** (A) IGV screenshot of compiled raw RNA-seq read data from BY4741 (*MATa*) and BY4742 (*MAT $\alpha$* ) strains. The top two blue peaks represent Smc4-myc and Sir2-myc ChIP-seq reads. (B) Quantitative ChIP assay showing additional SIR complex subunit enrichment at the *RDT1* promoter. (C) RT-qPCR showing effects of deleting *SIR2* and/or *HST1* on *RDT1* expression when HML is present or deleted (\* $p < 0.05$ , \*\* $p < 0.005$ ).

**Fig S2. Deletion of Sir2 or the *RDT1* promoter Sir2/condensin binding site does not affect protein levels of Sir2 or Myc-tagged condensin subunits.** (A) Western blot showing steady state Sir2 protein levels in WT (ML1), *sir2 $\Delta$*  (ML25), and 100bp $\Delta$  (ML275) strains. (B) Western blot with anti-Myc detection of Brn1-13xMyc or Sir2 in WT (ML149), *sir2 $\Delta$*  (ML161), and 100bp $\Delta$  (ML322) strains. (C) Western blot with anti-Myc detection of Smc4-13xMyc or Sir2 in WT (ML152), *sir2 $\Delta$*  (ML160), and 100bp $\Delta$  version.

**Fig S3. The *RDT1*-proximal Mcm1/a2 binding site (DPS2) is important for Sir2 and condensin recruitment.** (A) Schematic diagram depicting the location of the DPS2 sequence deletion relative to other elements with the RE, with the deleted chromosome III coordinates indicated in red. (B) Quantitative ChIP of native Sir2 in WT and *dps2 $\Delta$*  strains. (C) Quantitative ChIP of Brn1-Myc in WT and *dps2 $\Delta$*  strains. @*RDT1* promoter indicates enrichment at the Sir2/condensin peak (\*\* $p < 0.005$ ).

**Fig S4. Deleting the Sir2/condensin binding site within the RE (100bp $\Delta$ ) does not alter Sir2 function at *HML $\alpha$* . (A)** Quantitative mating assay for WT (ML1) and 100bp $\Delta$  (ML275) strains. **(B)** Quantitative ChIP assay showing Sir2 enrichment at *HML-I* in WT (ML1) and 100bp $\Delta$  (ML275) strains. (\*\*p<0.005).

**Fig S5. Auxin inducible degron (AID)-mediated depletion of Brn1 does not derepress *RDT1* or *HML $\alpha$* . (A)** Western blot time course of auxin induced degradation of Brn1::V5-AID. Time indicates minutes after addition of auxin. **(B)** RT-qPCR of *RDT1* expression following 30 or 60 minutes of Brn1 depletion by auxin. **(C)** RT-qPCR of *HMLALPHA2* expression following 30 or 60 min of Brn1 depletion by auxin.

## SUPPLEMENTAL REFERENCES

1. Li M, Petteys BJ, McClure JM, Valsakumar V, Bekiranov S, Frank EL, et al. Thiamine biosynthesis in *Saccharomyces cerevisiae* is regulated by the NAD<sup>+</sup>-dependent histone deacetylase Hst1. *Mol Cell Biol.* 2010;30(13):3329-41. PMID: 20439498.
2. Li M, Valsakumar V, Poorey K, Bekiranov S, Smith JS. Genome-wide analysis of functional sirtuin chromatin targets in yeast. *Genome Biol.* 2013;14(5):R48. PMID: 23710766.
3. Li J, Coic E, Lee K, Lee CS, Kim JA, Wu Q, et al. Regulation of budding yeast mating-type switching donor preference by the FHA domain of Fkh1. *PLoS Genet.* 2012;8(4):e1002630. PMID: 22496671.

4. Bhalla N, Biggins S, Murray AW. Mutation of YCS4, a budding yeast condensin subunit, affects mitotic and nonmitotic chromosome behavior. *Mol Biol Cell*. 2002;13(2):632-45. PMID: 11854418.



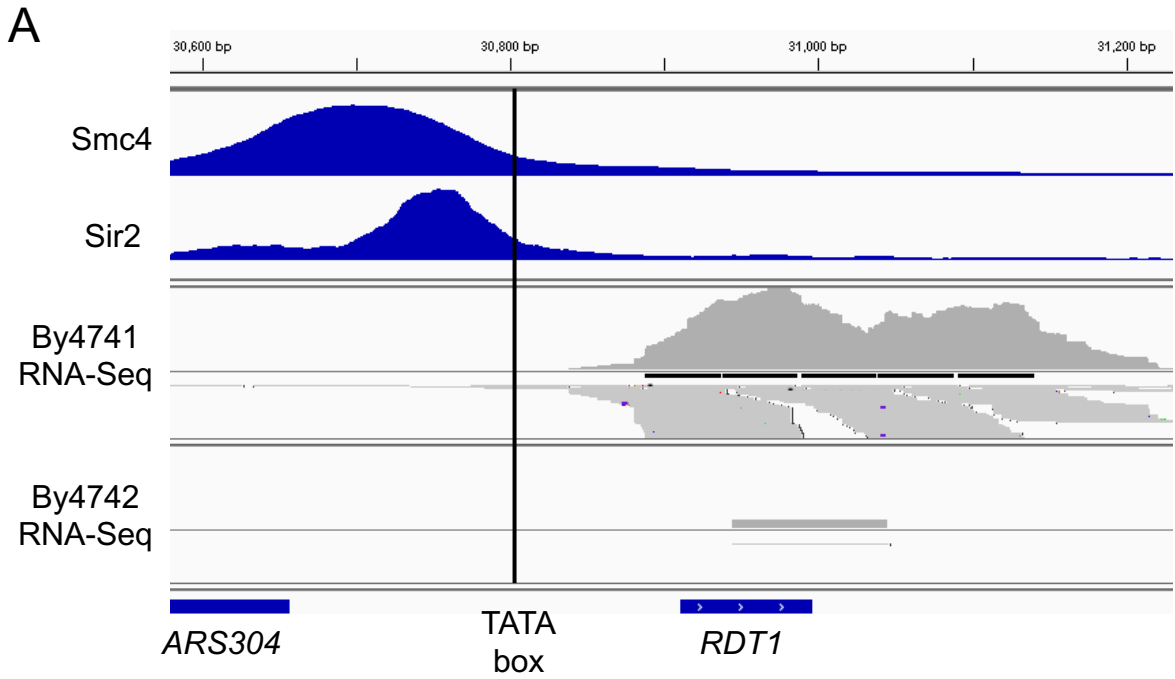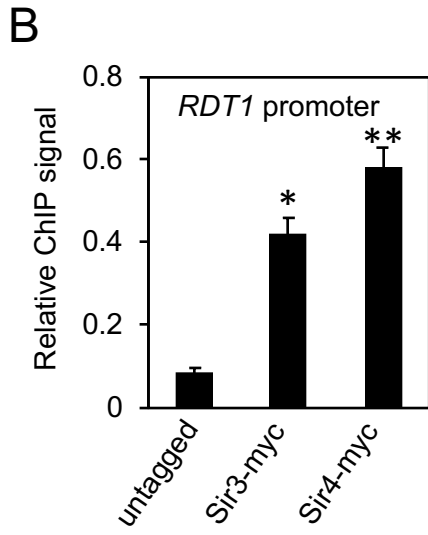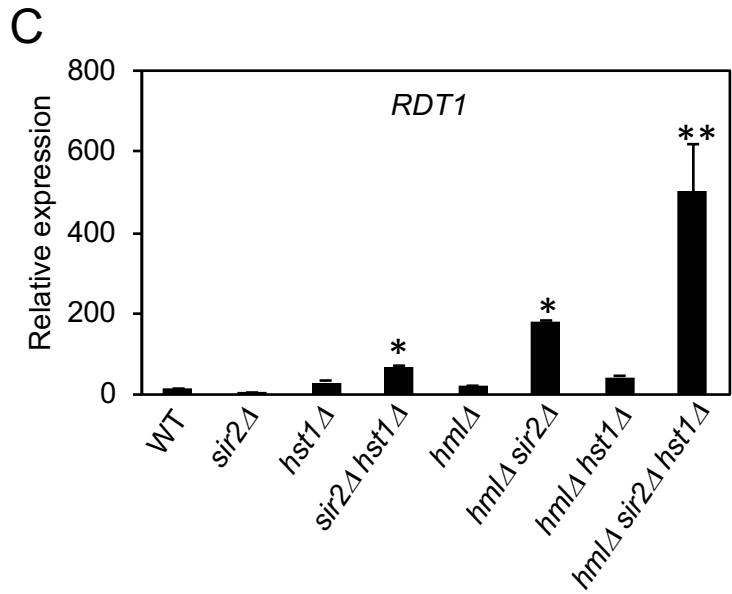

**A**

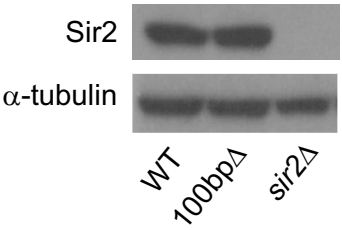

**B**

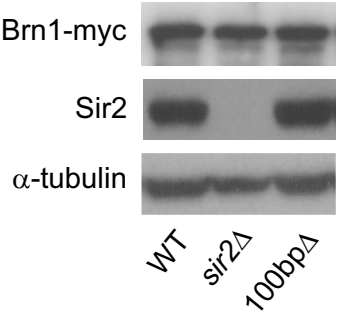

**C**

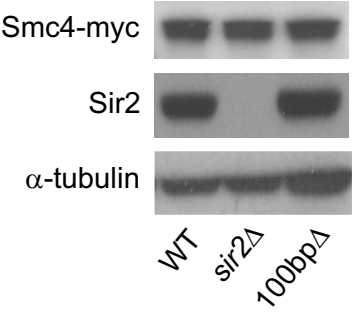

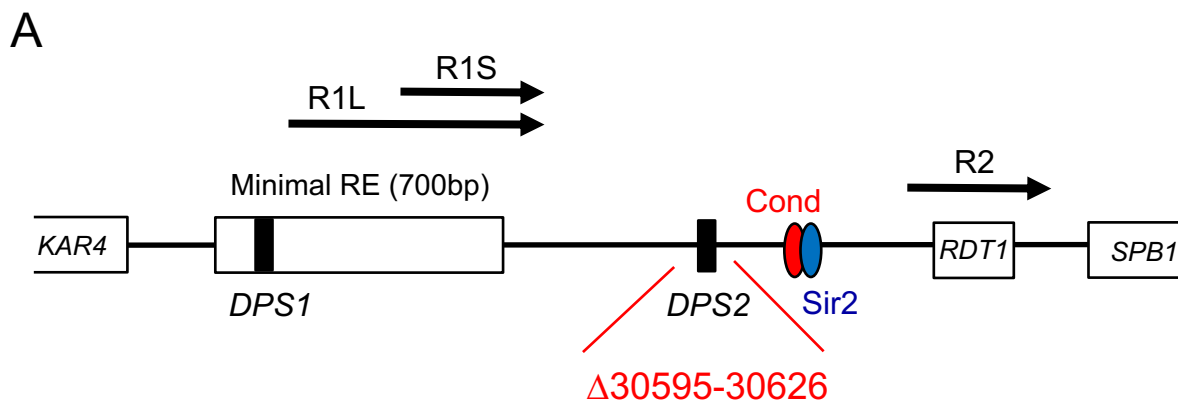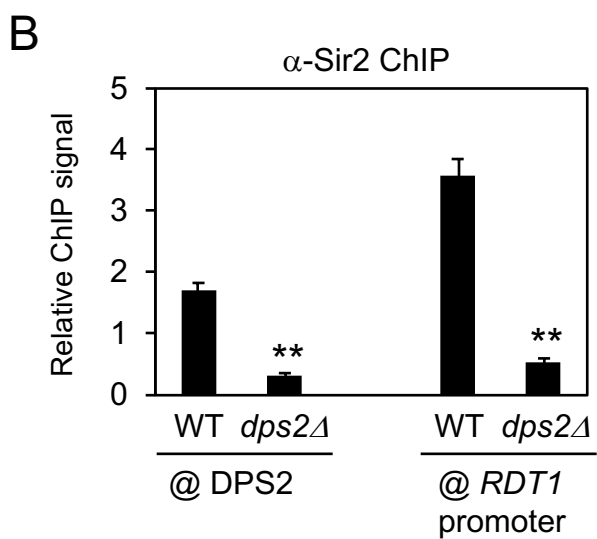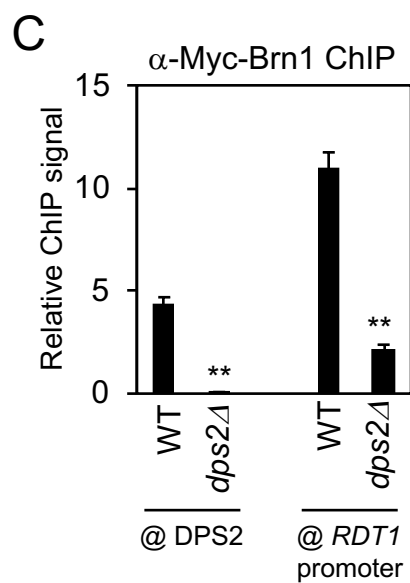

A

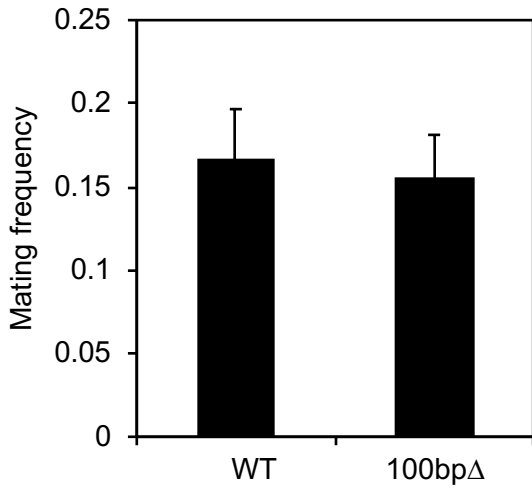

B

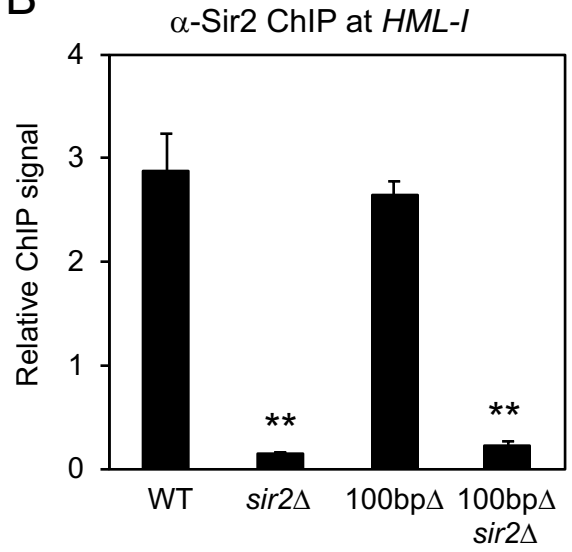

A

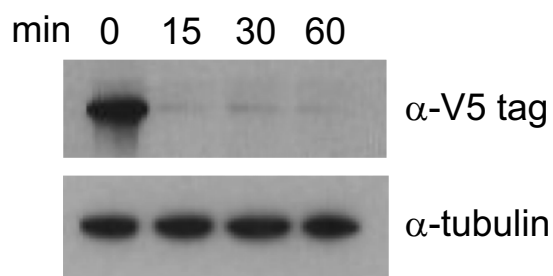

B

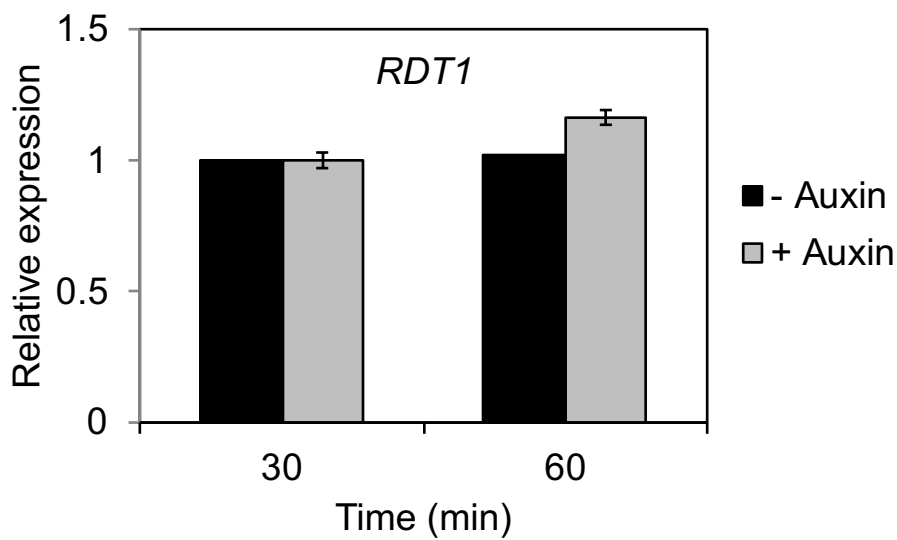

C

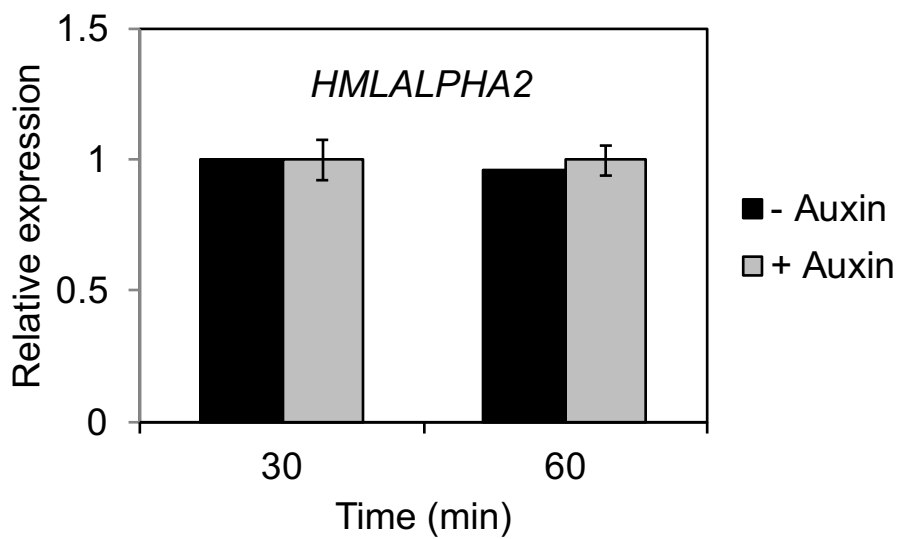

Supplement: Supplementary file [file media-1.pdf]
